# Supplementary material for: A multimodal integration pipeline for accurate diagnosis, pathogen identification, and prognosis prediction of pulmonary infections
Source: PubMed Central journal article supplement — Innovation (Camb). 2024 May 22;5(4):100648. doi: 10.1016/j.xinn.2024.100648 (PMC11253137; doi:10.1016/j.xinn.2024.100648), 2024-05-22
Supplement: mmc2.pdf [file mmc2.pdf]

# A multimodal integration pipeline for accurate diagnosis, pathogen identification, and prognosis prediction of pulmonary infections

Jun Shao,<sup>1,2,3,6</sup> Jiechao Ma,<sup>4,6</sup> Yizhou Yu,<sup>5,6</sup> Shu Zhang,<sup>4</sup> Wenyang Wang,<sup>1,2</sup> Weimin Li,<sup>1,2,3,\*</sup> and Chengdi Wang<sup>1,2,3,\*</sup>

\*Correspondence: [chengdi\\_wang@scu.edu.cn](mailto:chengdi_wang@scu.edu.cn) (C.W.); [weimi003@scu.edu.cn](mailto:weimi003@scu.edu.cn) (W.L.)

Received: September 25, 2023; Accepted: May 19, 2024; Published Online: May 22, 2024; <https://doi.org/10.1016/j.xinn.2024.100648>

© 2024 The Author(s). This is an open access article under the CC BY-NC-ND license (<http://creativecommons.org/licenses/by-nc-nd/4.0/>).

## GRAPHICAL ABSTRACT

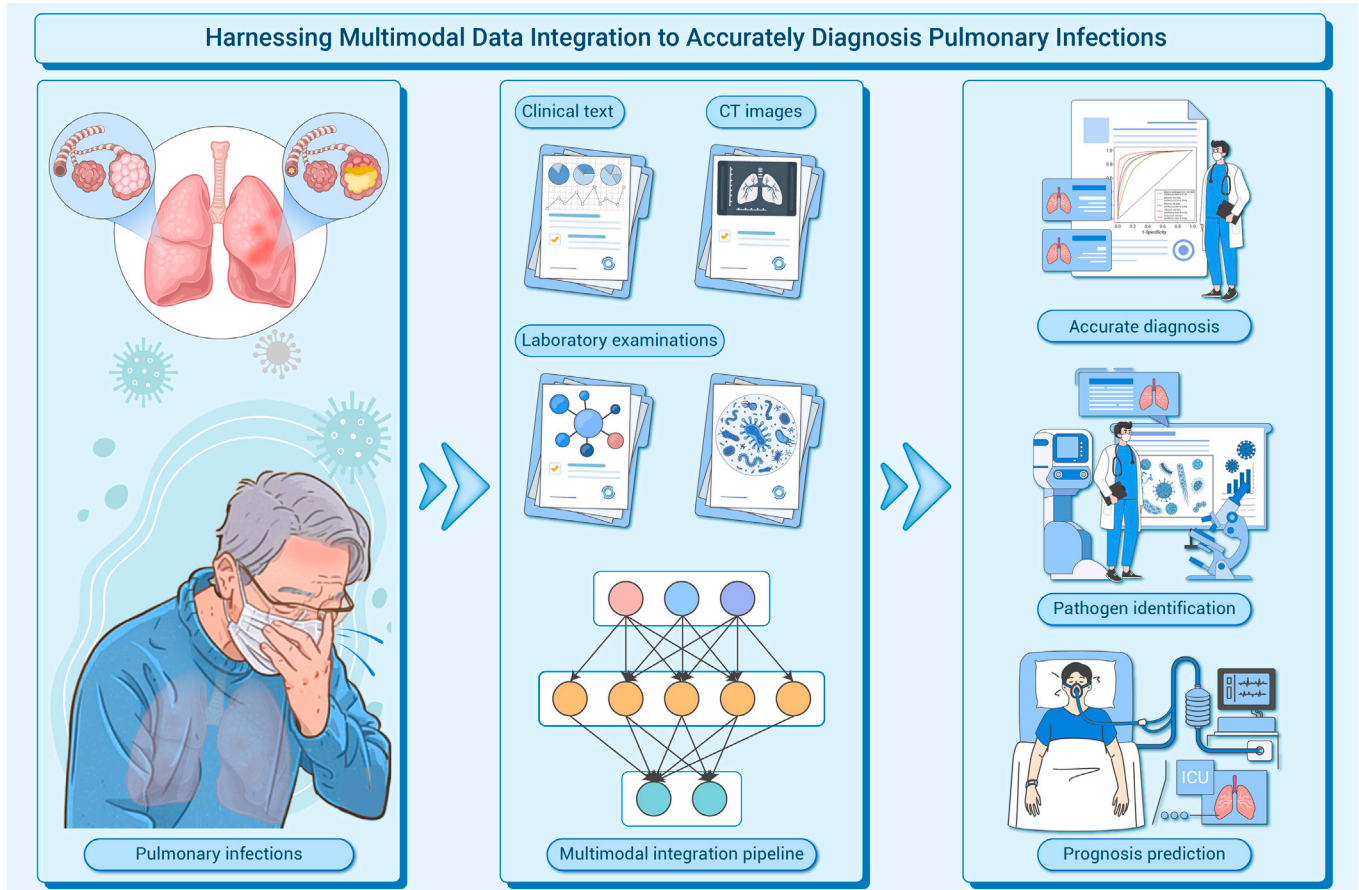

## PUBLIC SUMMARY

- Multimodal integration pipeline could diagnose pulmonary infections based on clinical characteristics, CT images, and laboratory test results.
- The pipeline achieved diagnostic performance comparable with senior physicians.
- In addition to assessing pulmonary infections, the automated system could also predict progression to critical illness and facilitate early intervention.

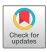

# A multimodal integration pipeline for accurate diagnosis, pathogen identification, and prognosis prediction of pulmonary infections

Jun Shao,<sup>1,2,3,6</sup> Jiechao Ma,<sup>4,6</sup> Yizhou Yu,<sup>5,6</sup> Shu Zhang,<sup>4</sup> Wenyang Wang,<sup>1,2</sup> Weimin Li,<sup>1,2,3,\*</sup> and Chengdi Wang<sup>1,2,3,\*</sup>

<sup>1</sup>Department of Pulmonary and Critical Care Medicine, State Key Laboratory of Respiratory Health and Multimorbidity, West China Hospital, West China School of Medicine, Sichuan University, Chengdu 610041, China

<sup>2</sup>Targeted Tracer Research and Development Laboratory, Institute of Respiratory Health, Frontiers Science Center for Disease-related Molecular Network, West China Hospital, Sichuan University, Chengdu 610213, China

<sup>3</sup>Frontiers Medical Center, Tianfu Jincheng Laboratory, Chengdu 610213, China

<sup>4</sup>AI Lab, Deepwise Healthcare, Beijing 100080, China

<sup>5</sup>Department of Computer Science, The University of Hong Kong, Hong Kong SAR, China

<sup>6</sup>These authors contributed equally

\*Correspondence: [chengdi\\_wang@scu.edu.cn](mailto:chengdi_wang@scu.edu.cn) (C.W.); [weimi003@scu.edu.cn](mailto:weimi003@scu.edu.cn) (W.L.)

Received: September 25, 2023; Accepted: May 19, 2024; Published Online: May 22, 2024; <https://doi.org/10.1016/j.xinn.2024.100648>

© 2024 The Author(s). This is an open access article under the CC BY-NC-ND license (<http://creativecommons.org/licenses/by-nc-nd/4.0/>).

Citation: Shao J., Ma J., Yu Y., et al., (2024). A multimodal integration pipeline for accurate diagnosis, pathogen identification, and prognosis prediction of pulmonary infections. *The Innovation* **5**(4), 100648.

Pulmonary infections pose formidable challenges in clinical settings with high mortality rates across all age groups worldwide. Accurate diagnosis and early intervention are crucial to improve patient outcomes. Artificial intelligence (AI) has the capability to mine imaging features specific to different pathogens and fuse multimodal features to reach a synergistic diagnosis, enabling more precise investigation and individualized clinical management. In this study, we successfully developed a multimodal integration (MMI) pipeline to differentiate among bacterial, fungal, and viral pneumonia and pulmonary tuberculosis based on a real-world dataset of 24,107 patients. The area under the curve (AUC) of the MMI system comprising clinical text and computed tomography (CT) image scans yielded 0.910 (95% confidence interval [CI]: 0.904–0.916) and 0.887 (95% CI: 0.867–0.909) in the internal and external testing datasets respectively, which were comparable to those of experienced physicians. Furthermore, the MMI system was utilized to rapidly differentiate between viral subtypes with a mean AUC of 0.822 (95% CI: 0.805–0.837) and bacterial subtypes with a mean AUC of 0.803 (95% CI: 0.775–0.830). Here, the MMI system harbors the potential to guide tailored medication recommendations, thus mitigating the risk of antibiotic misuse. Additionally, the integration of multimodal factors in the AI-driven system also provided an evident advantage in predicting risks of developing critical illness, contributing to more informed clinical decision-making. To revolutionize medical care, embracing multimodal AI tools in pulmonary infections will pave the way to further facilitate early intervention and precise management in the foreseeable future.

## INTRODUCTION

Lower respiratory tract infections are one of the leading causes of death worldwide and contribute to a significant disease burden, which impacted 344 million people and resulted in 2.18 million deaths according to the 2021 Global Burden of Diseases study.<sup>1,2</sup> Pneumonia—attributable to bacteria, viruses, and fungi—is recognized as the most pervasive infectious disease globally, further aggravated by the COVID-19 pandemic.<sup>3</sup> In addition, *Mycobacterium tuberculosis* also poses a significant lung infection risk, with 6.2 million people diagnosed with pulmonary tuberculosis (PTB) worldwide.<sup>4,5</sup> There are variations in the treatment strategies for different pathogens, but a staggering 62% of patients lack a definitive pathogen diagnosis.<sup>6–8</sup> The traditional diagnostic gold standard requires obtaining respiratory samples for microbial smears or cultures, which is plagued by insensitivity and protracted processing time.<sup>3,9</sup> Once pulmonary infections patients receive delayed treatment and develop severe disease, their mortality rate soars to 50%.<sup>10</sup> Hence, a rapid and accurate method for pulmonary infection diagnosis, pathogen detection, and severe disease prediction is urgently needed in clinical scenarios.

The diagnosis of pulmonary infections calls for a multifaceted approach encompassing clinical assessments, laboratory tests, and other indicators.<sup>3,11</sup> The predominant symptoms, cough and expectoration, are common clinical manifestations. Additionally, peripheral blood leukopenia has

significance in bacterial infection, signaling critical illness and an unfavorable prognosis. Chest computed tomography (CT) also acts as a crucial supportive tool for diagnosing pulmonary infections, offering three-dimensional representations of pulmonary structures.<sup>12</sup> Discrepancies exist in the imaging manifestations of different types of pathogenic infections. For example, the imaging of bacterial pneumonia typically reveals alveolar infiltrates or solid changes, whereas the imaging of viral pneumonia is characterized mostly by ground-glass opacities (GGOs) alongside solid shadows.<sup>11</sup> In cases of severe pneumonia, the percentage of lesion-involved areas in the chest CT images of patients frequently exceeds 50%.<sup>13</sup> However, the radiographic manifestations of pneumonia exhibit an overlap across diverse pathogens, and the imaging signs of specific pathogenic infections can vary among individuals. This phenomenon complicates the accurate diagnosis of pulmonary infections for physicians and renders the non-invasive identification of the pathogen even more challenging.

The rapid development of artificial intelligence (AI) technology has catalyzed innovation regarding medical tasks.<sup>14–18</sup> AI models have garnered remarkable results in skin cancer subtype classification, diabetic retinopathy diagnosis, respiratory disease diagnosis, and prognosis assessment.<sup>19–24</sup> With the evolution of AI technology, a trend of multimodal fusion has emerged, providing a more comprehensive approach that resonates with real-world clinical applications.<sup>25–28</sup> In terms of pulmonary infections, a surge of intelligent diagnostic models has been noted in recent years.<sup>29–37</sup> For instance, advanced diagnostic architectures employing the DenseNet-121 deep learning network have been established to identify viral, non-viral, and COVID-19 pneumonia based on chest X-ray (CXR) images, demonstrating impressive discrimination capabilities (area under the curve [AUC]: 0.867–0.966).<sup>29</sup> Another convolutional neural network model using CXR images was constructed to diagnose PTB with an AUC of 0.992 (95% confidence interval [CI]: 0.961–1.000), and the performance of the pre-trained network was 11% higher than that of the untrained network.<sup>30</sup> However, CXR is a two-dimensional imaging technique with inherent limitations regarding diagnostic utility. Furthermore, an AI model based on the quantitative analysis of CT images was constructed to automatically localize typical foci of pneumonia, such as GGOs and solid changes, accurately distinguishing pneumonia with remarkable performance (AUC: 0.975).<sup>31</sup> Additionally, investigations have integrated CT images with clinical information from diverse cohorts to rapidly diagnose pulmonary infections patients, outperforming the single-modality model (AUC: 0.92 vs. 0.80).<sup>32</sup> However, the majority of studies focus narrowly on individual pathogen but ignore the complexity of multiple infection types. Moreover, merely utilizing unimodal imaging data for detecting pneumonia have curtailed the ability of these AI models to make a more detailed and accurate diagnosis compared to the use of multimodal information, which integrates data from various dimensions.

In this study, we developed a multimodal integration (MMI) pipeline to assist with the precise diagnosis of bacterial, fungal, and viral pneumonia as well as PTB and to facilitate pathogen prediction (Figure 1). In addition, crucial features

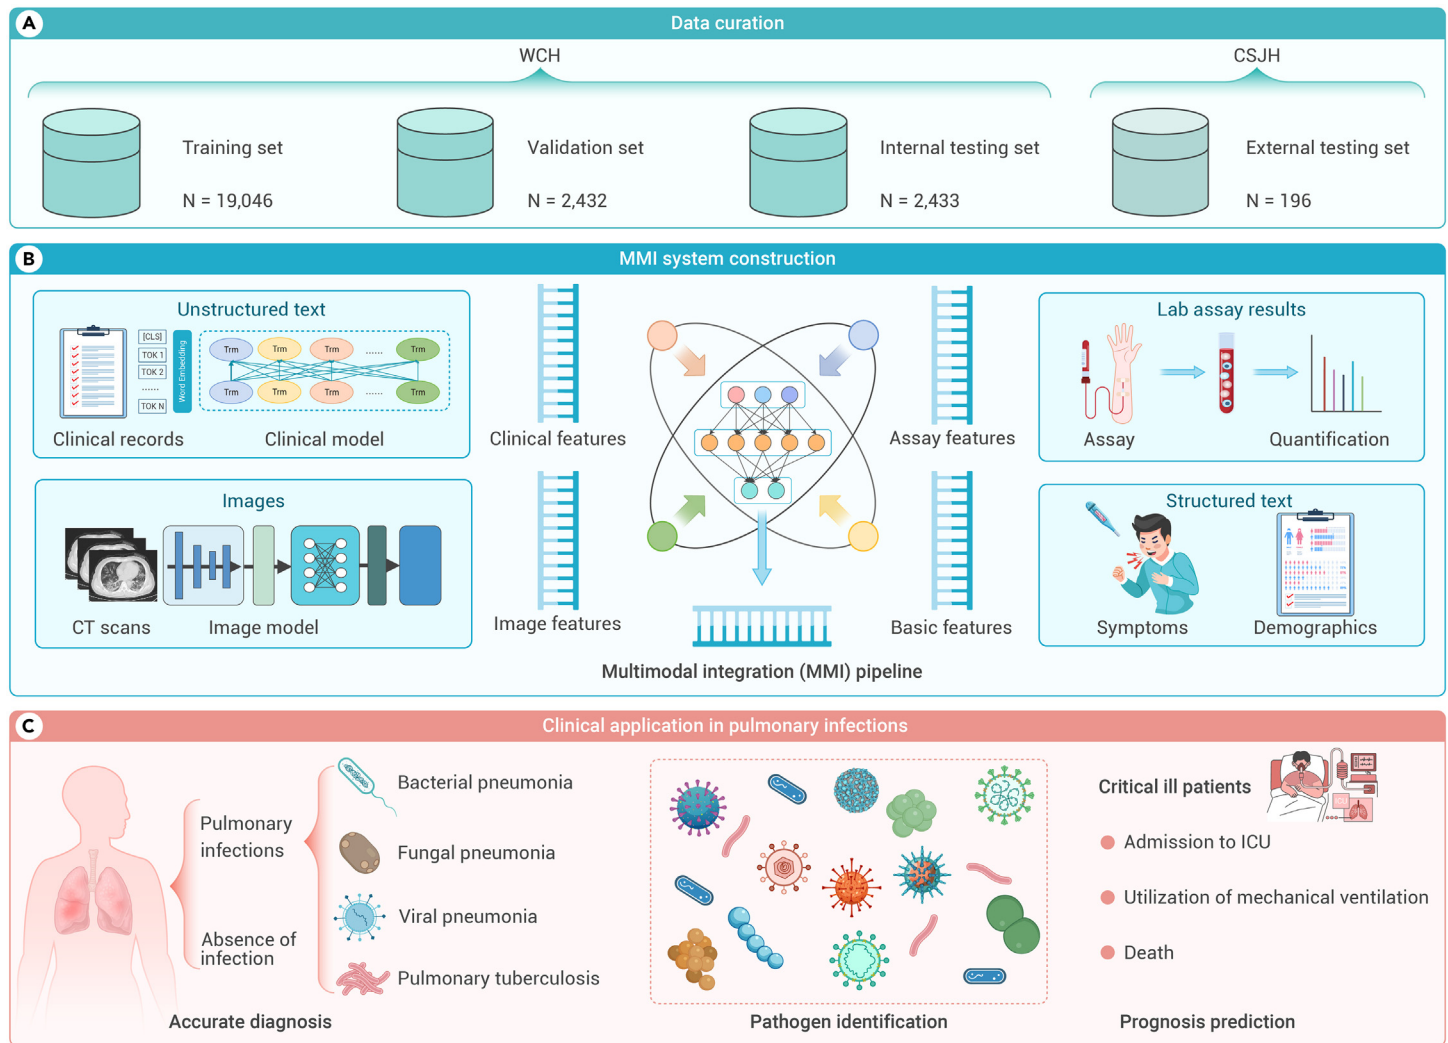

**Figure 1. Overview of the multimodal integration (MMI) pipeline for pulmonary infection management** (A) Patients were identified and divided into training (WCH,  $N = 19,046$ ), validation (WCH,  $N = 2,432$ ), internal (WCH,  $N = 2,433$ ), and external testing (CSJH;  $N = 196$ ) datasets for the MMI system. (B) Development of the MMI system through the integration of multimodal data. It integrated multimodal information, including unstructured text, images, lab assay results, and structured text to construct the system. (C) Application of the MMI system in clinical settings for the diagnosis of infectious diseases, identification of pathogens, and risk prediction of critical patients, showcasing the actual utility of the AI model in managing pulmonary infections. CSJH, Chengdu ShangJin Nanfu Hospital; ICU, intensive care unit; WCH, West China Hospital.

were filtered to predict the probability of severe pneumonia. The MMI system holds the potential to assist physicians with improving clinical efficiency and personalizing the fine management of patients with pulmonary infections.

## RESULTS

### Participant characteristics

An extensive large dataset of 161,258 chest CT scans from 54,581 patients with associated clinical information and laboratory examinations was assembled from West China Hospital (WCH) of Sichuan University and Chengdu ShangJin Nanfu Hospital (CSJH). The data from WCH were employed for training, validation, and internal testing, while the data from CSJH served as an external testing set to ensure the robustness of the model. The study population (subset 1, primary prediction) consisted of 24,107 patients to discriminate pulmonary infections (Table S1).

To advance the retrospective diagnosis of infection subtypes and prognosticate severe acute respiratory failure, we developed the multimodal system to predict four infections, specific infectious pathogens, and severe pneumonia utilizing distinct subsets (Figure S1). Subset 2 (infection classification,  $N = 13,361$ ) was utilized to construct and validate the performance of the MMI system in predicting primary infections. The infections were categorized into four types: bacterial pneumonia (BP), fungal pneumonia (FP), viral pneumonia (VP), and PTB. Additionally, subset 3 (virus subtypes prediction,  $N = 2,520$ ) and subset 4 (bacteria subtypes prediction,  $N = 535$ ) were employed to identify the specific infectious pathogens associated with the viral and bacterial pneumonia.

Furthermore, subset 5, consisting of 2,672 patients with severe pneumonia, was thoroughly examined. Severe pneumonia was defined based on criteria including clinical need for transfer to the intensive care unit (ICU), the requirement for mechanical ventilation, or death. These patients were identified based on their progression to critical outcomes after admission. This subset was specifically selected to evaluate the performance of our system in predicting critical outcomes that occurred 14 days after admission, specifically targeting patients at a higher risk of developing acute respiratory failure.

### MMI system development

The proposed disease recognition system incorporated clinical medical records, laboratory test results, and CT images to expedite the identification of pulmonary infections. To effectively extract information from medical records text, we leveraged bidirectional encoder representations from transformers (BERT), an advanced network-based pre-training technique for natural language processing.<sup>38,39</sup> Additionally, to capture the spatial features of the CT image findings, we utilized image-based backbone networks known as Swin-transformer structures.<sup>40,41</sup> The Swin-transformer is an architecture based on transformer that hierarchically process input tokens. This hierarchical processing allows for the incorporation of larger patch sizes and deeper models, thus enhancing performance in image recognition tasks while maintaining computational efficiency.

To further bolster the performance and exploit the complementary information from textual and image features, this multimodal system integrated basic demographic details, chief complaints, laboratory test results, and CT scans to assess

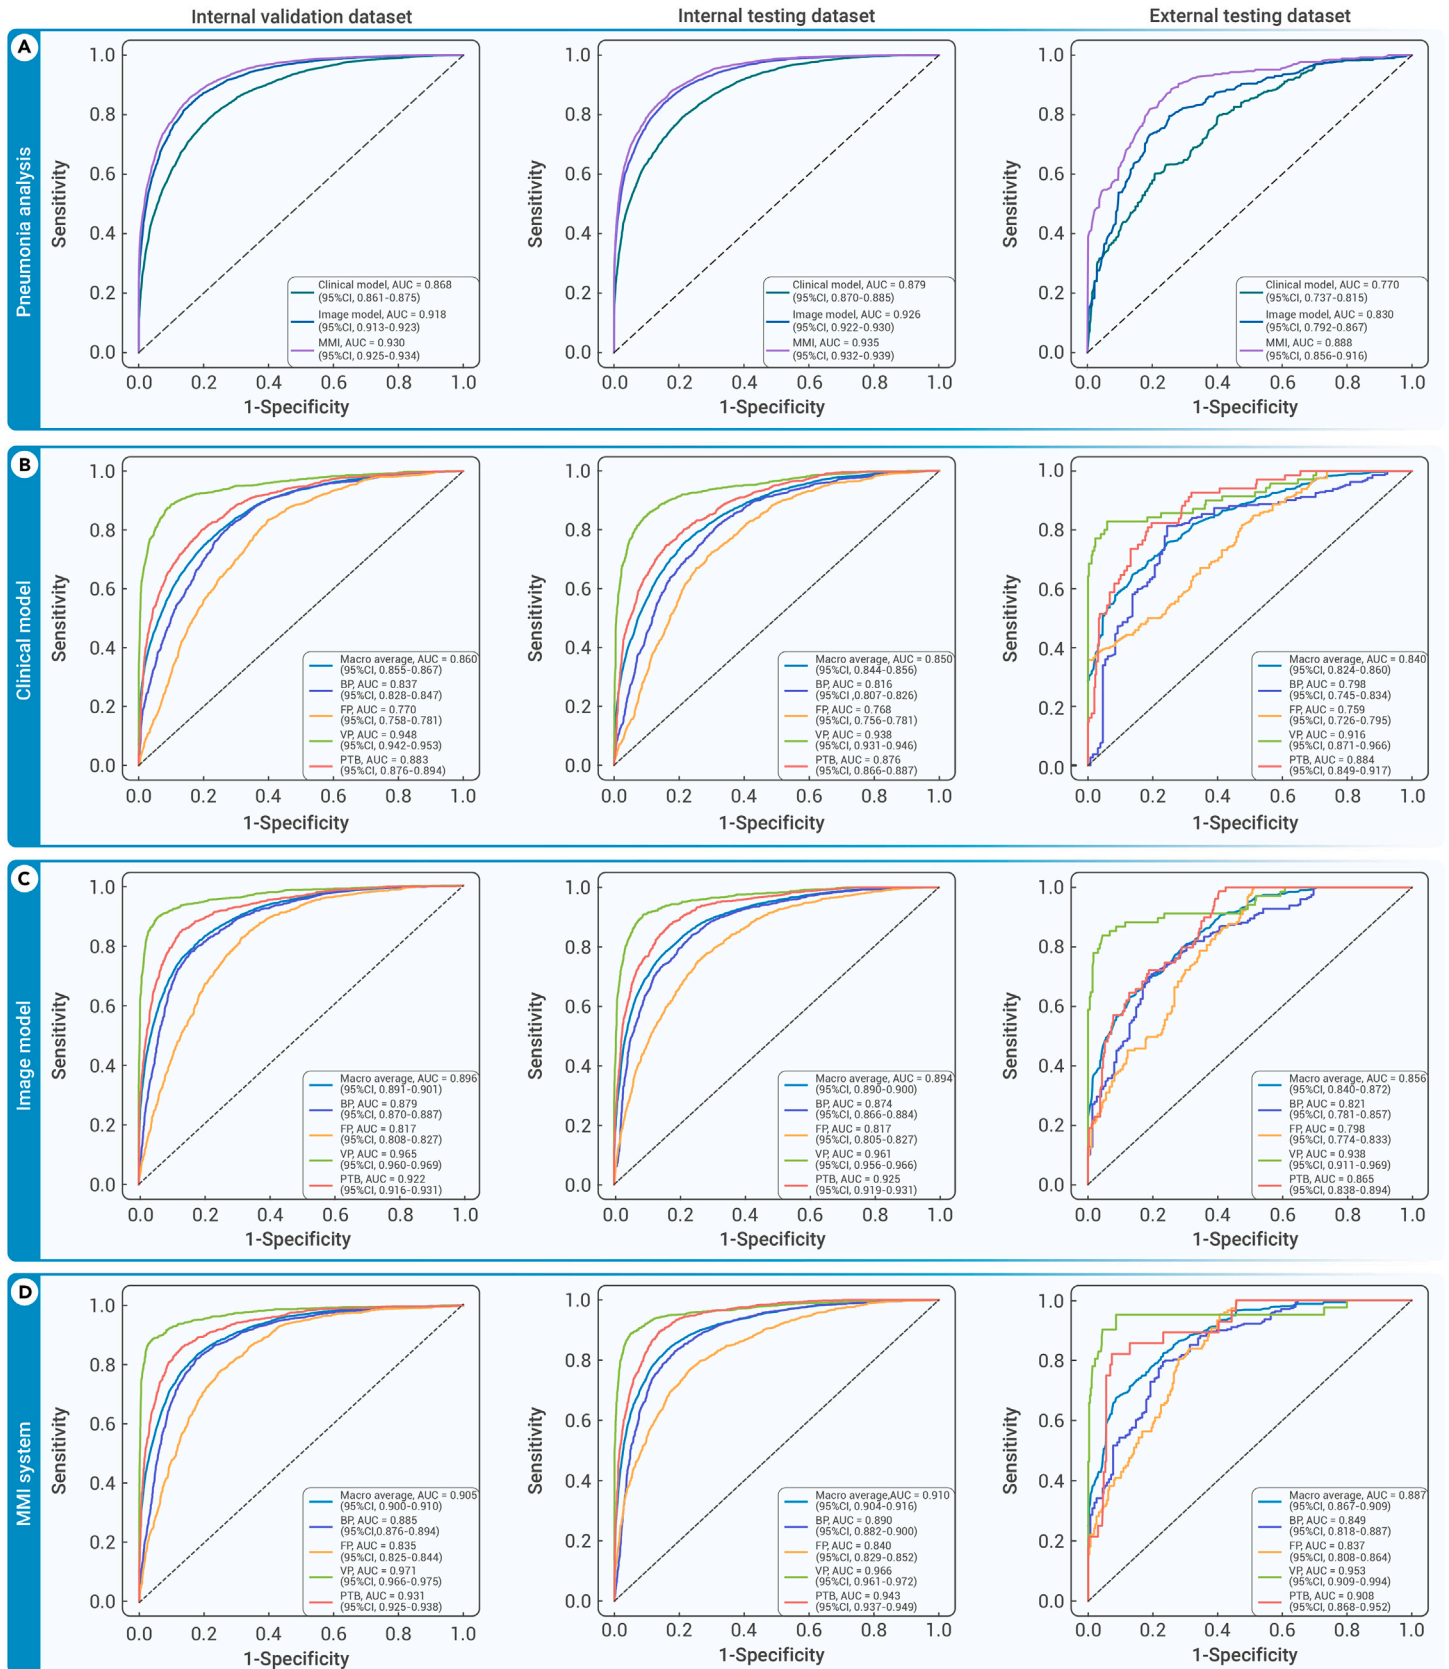

**Figure 2. Performance of the MMI system in identifying patients with pulmonary infections** (A) Comparison of the receiver operating characteristic (ROC) curves of the clinical model, image model, and MMI system for detecting pulmonary infections in the validation, internal testing, and external testing datasets. (B–D), The ROCs for predicting four pulmonary infection types (bacterial pneumonia, fungal pneumonia, viral pneumonia, and PTB) utilizing the clinical model (B), image model (C), and MMI system (D) in the validation, internal testing, and external testing datasets. BP, bacterial pneumonia; FP, fungal pneumonia; PTB, pulmonary tuberculosis; VP, viral pneumonia.

**Table 1.** Performance of the MMI system in identifying BP, FP, VP, and PTB

|                | Dataset          | Sensitivity (95% CI) | Specificity (95% CI) | Accuracy (95% CI)   | AUC (95% CI)        |
|----------------|------------------|----------------------|----------------------|---------------------|---------------------|
| Clinical model | Validation       | 0.830 (0.816–0.847)  | 0.760 (0.747–0.772)  | 0.786 (0.777–0.795) | 0.860 (0.855–0.867) |
|                | Internal testing | 0.785 (0.764–0.804)  | 0.779 (0.767–0.792)  | 0.788 (0.777–0.798) | 0.850 (0.844–0.856) |
|                | External testing | 0.706 (0.644–0.765)  | 0.875 (0.846–0.904)  | 0.788 (0.755–0.821) | 0.840 (0.824–0.860) |
| Image model    | Validation       | 0.838 (0.822–0.854)  | 0.832 (0.820–0.843)  | 0.832 (0.824–0.842) | 0.896 (0.891–0.901) |
|                | Internal testing | 0.847 (0.829–0.861)  | 0.806 (0.795–0.819)  | 0.821 (0.812–0.830) | 0.894 (0.890–0.900) |
|                | External testing | 0.883 (0.853–0.920)  | 0.711 (0.674–0.749)  | 0.755 (0.727–0.788) | 0.856 (0.840–0.872) |
| MMI system     | Validation       | 0.836 (0.820–0.853)  | 0.850 (0.840–0.861)  | 0.846 (0.838–0.855) | 0.905 (0.900–0.910) |
|                | Internal testing | 0.846 (0.830–0.860)  | 0.847 (0.837–0.858)  | 0.848 (0.838–0.856) | 0.910 (0.904–0.916) |
|                | External testing | 0.880 (0.819–0.944)  | 0.800 (0.766–0.839)  | 0.835 (0.807–0.865) | 0.887 (0.867–0.909) |

infectious diseases. Employing an attention architecture, we amalgamated the unimodal feature spaces learned from clinical and image data into a unified representation, forming the multimodal features. By extracting discriminative features from the clinical and image data, this system captured the specific information characteristics of each modality. These features were then integrated into a shared feature space, allowing the capture of intricate relationships and leveraging complementary information across different modalities. This integration augmented disease identification accuracy, empowering the MMI system to integrate multiple sources of information and effectively make precise predictions.

### Accurate diagnosis of pulmonary infections

In this primary prediction task, our findings demonstrated that both clinical features and image features alone exhibited significant discriminative power in distinguishing infections from cases without infections, thus achieving a satisfactory baseline performance (Figure 2A; Table S2). Specifically, the clinical model achieved an AUC of 0.879 (95% CI: 0.870–0.885), while the image model achieved an AUC of 0.926 (95% CI: 0.922–0.930) on the internal testing cohort. These results underscore the potential of both clinical and image features as valuable discriminators for infections amid lower respiratory tract conditions. Nevertheless, integrating these features resulted in a substantial improvement

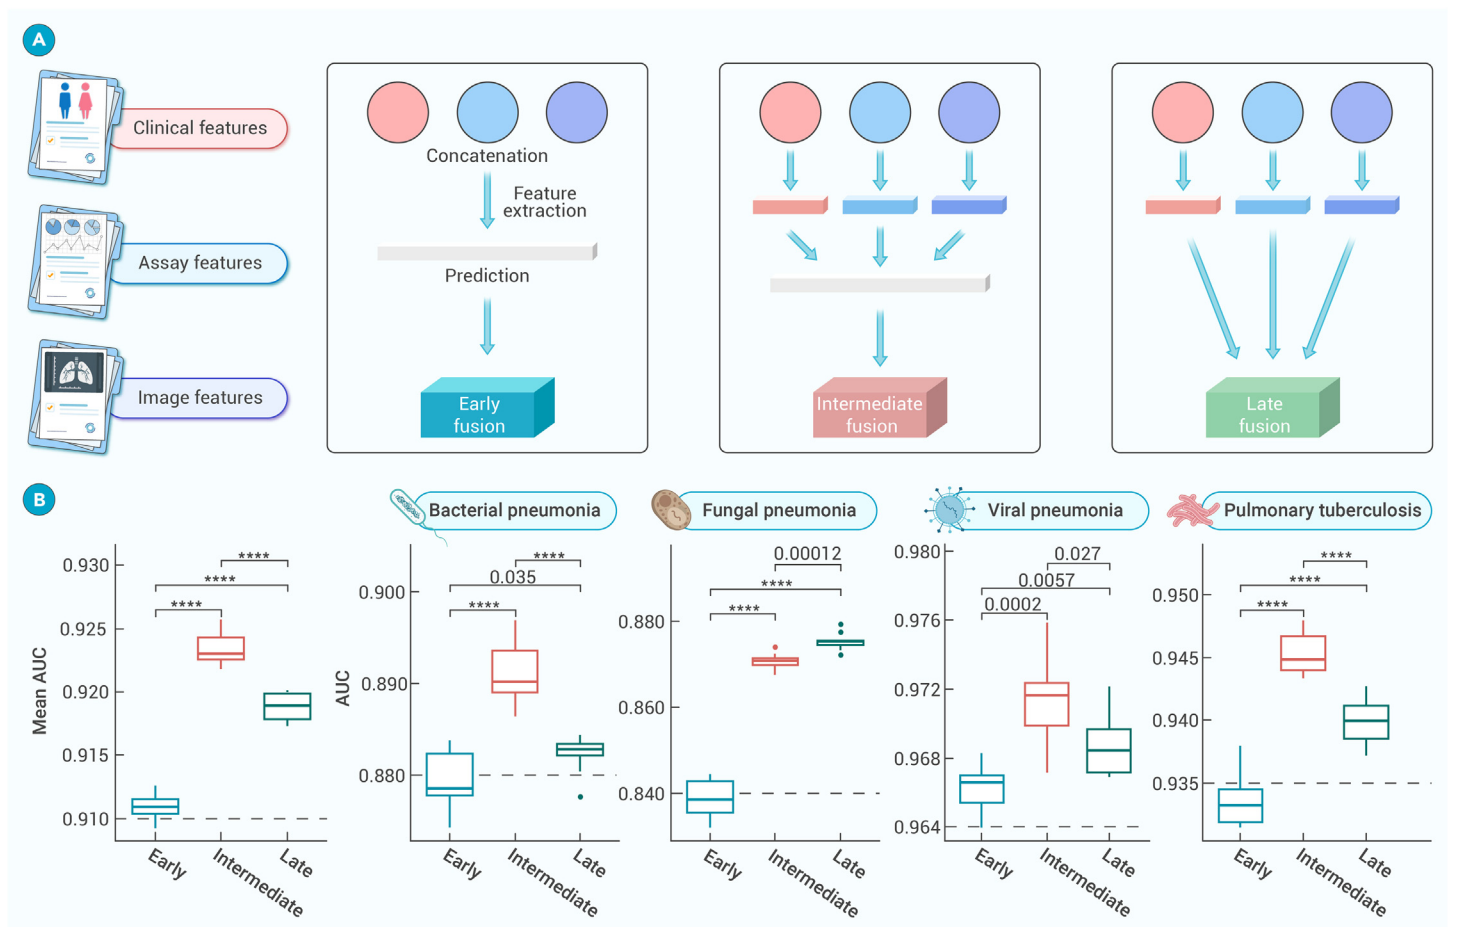

**Figure 3.** Performance of the MMI system using different fusion approaches in identifying pulmonary infections types (A) Structure diagram of different fusion strategies: early fusion, intermediate fusion, and late fusion. Further details were provided in Figure S4. (B) Evaluation of the three fusion approaches to predict pneumonia types (average performance, bacterial pneumonia, fungal pneumonia, viral pneumonia, and pulmonary tuberculosis) in the internal testing dataset. The performance measures were visualized through boxplots representing the statistical distribution of AUCs, including maximum, minimum, median, and upper and lower quartiles of a set of data (first/third quartile) as well as outliers. A t test was used to calculate the *p* value between approaches: \*\*\*\**p* < 0.0001.

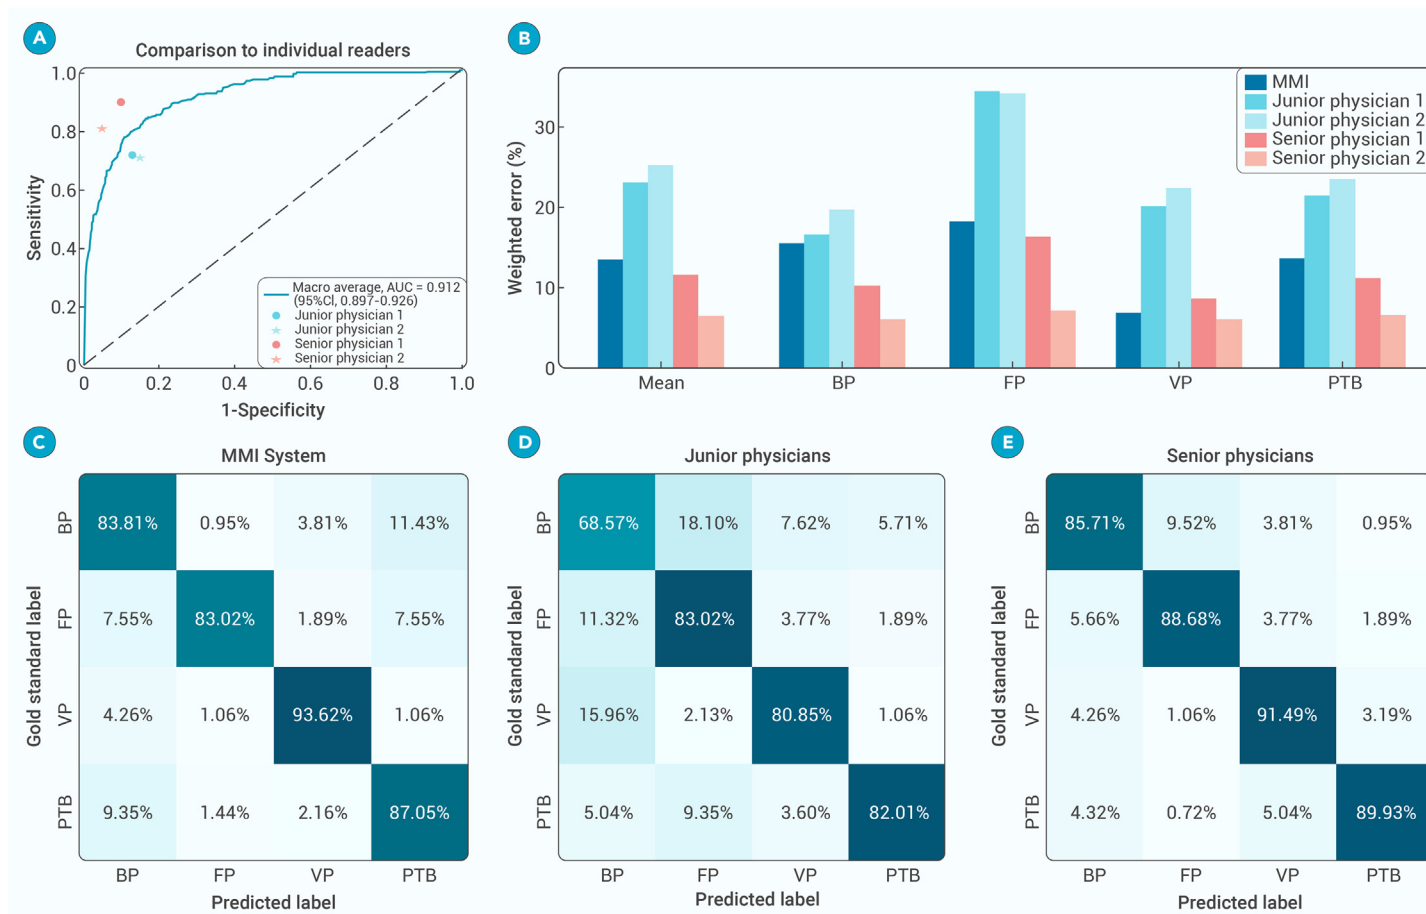

**Figure 4. Benchmarking the MMI system vs. physicians in diagnosing pulmonary infections** (A) The diagnostic performance of the MMI system and physicians for BP, FP, VP, and PTB. (B) Weighted error results based on penalty scores. (C–E), The confusion matrix of the MMI system (C), junior physicians (D), and senior physicians (E) to differentiate among various types of pulmonary infections.

in the performance of the MMI system. When combined, the accuracy of MMI system increased significantly to 0.849 (95% CI: 0.844–0.855), with a sensitivity of 0.866 (95% CI: 0.857–0.874), specificity of 0.838 (95% CI: 0.829–0.848), and AUC of 0.935 (95% CI: 0.932–0.939) (Table S2). These findings emphasized the critical role of multi-information integration and the effectiveness of fusion strategies in enhancing the accuracy of infection identification. The combination of clinical and image features furnished a more comprehensive and more robust framework to accurately discriminate pulmonary infections from other diseases with heightened accuracy.

Remarkably, the multimodal system demonstrated exemplary performance in identifying infections within the external testing set. It achieved a mean accuracy of 0.919 (95% CI: 0.898–0.937), signifying a remarkably high level of overall correctness (Table S2). Additionally, the AUC exhibited a significant improvement, increasing from 0.830 (95% CI: 0.792–0.867) of the image model to 0.888 (95% CI: 0.856–0.916) of the MMI system. This notable increase further corroborated superior generalization ability of the MMI system in handling unknown data distributions and highlights its robustness in accurately distinguishing between infected and non-infected cases.

#### Performance of MMI system in single and mixed infections

It is notable that the current AI models tend to focus on single infection, often neglecting mixed infections. This narrow focus will potentially jeopardize their efficacy and impede their practical applications. To solve this problem, we utilized multilabel system to distinguish between single infection type and more than one infection type. This approach enabled us to assess the performance of the model in a more diverse and clinically relevant setting.

When comparing the diagnosis of single-infection patients to that of mixed infections, the latter posed greater challenges, as indicated in Table S3. Remarkably, the performance of the single infection model yielded an impressive AUC

of 0.949 (95% CI: 0.943–0.954), while the mixed infections cases still achieved a respectable AUC of 0.876 (95% CI: 0.861–0.890). These results highlighted the capability of our multilabel multimodal model to deliver superior performance in both the relatively simpler cases of single infection and the more complex cases of mixed infections.

#### Precise classification of infectious diseases

Pulmonary infections encompass various subtypes, such as bacterial, fungal, and viral pneumonia and PTB. Nevertheless, accurate differentiation of respiratory tract infections presents a formidable challenge, even for experienced physicians in tertiary hospitals. When considering clinical features alone, the model achieved an accuracy of 0.788 (95% CI: 0.777–0.798) and an average mean AUC of 0.850 (95% CI: 0.844–0.856) in the internal testing dataset (Figures 2B; Table 1). In a similar vein, exclusively employing image features, the model achieved an accuracy of 0.821 (95% CI: 0.812–0.830) and an average mean AUC of 0.894 (95% CI: 0.890–0.900) (Figure 2C). Significantly, amplification of the model's efficacy by supplementing information and purging noisy or incomplete data from these modalities culminated in peak performance. The MMI system realized an accuracy of 0.848 (95% CI: 0.838–0.856), a sensitivity of 0.846 (95% CI: 0.830–0.860), a specificity of 0.847 (95% CI: 0.837–0.858), and an AUC of 0.910 (95% CI: 0.904–0.916) in the internal testing dataset (Figure 2D). In external testing dataset, the AUC of the MMI system yielded 0.887 (95% CI: 0.867–0.909). These results demonstrated the iterative improvements achieved by optimizing the model and incorporating relevant information. By refining the fusion of multiple modalities, we obtained optimal performance in accurately identifying and differentiating the subtypes within the four-class task. A delineation of performance breakdown for the individual four-class task is presented in Table 1 and Figure S2.

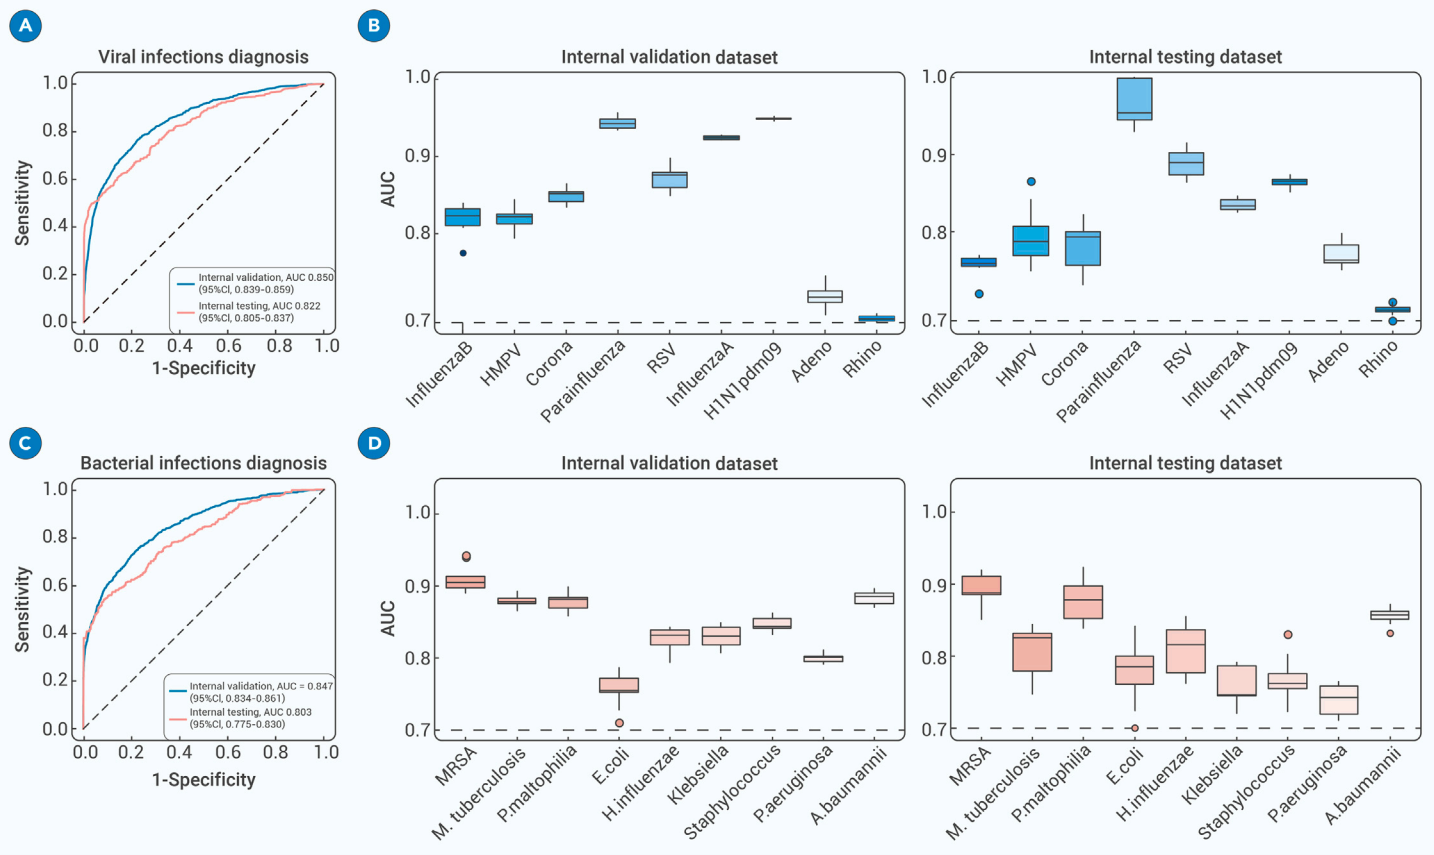

**Figure 5. Performance of our AI system in identifying different subtypes of viruses and bacterial subtypes** (A) Mean ROCs demonstrating MMI system accuracy in identifying viral infections within the internal validation and testing cohorts. (B) Boxplots showing MMI system performance for classifying nine viral subtypes. (C) Mean ROCs highlighting MMI system accuracy in identifying bacterial infections within the internal validation and testing cohorts. (D) Boxplots presenting MMI system performance for classifying nine bacterial subtypes. *A.baumannii*, *Acinetobacter baumannii*; *E.coli*, *Escherichia coli*; HMPV, human metapneumovirus; *H.influenzae*, *Haemophilus influenzae*; MRSA, Methicillin-resistant *Staphylococcus aureus*; MMI, multimodal integration; *M.tuberculosis*, *Mycobacterium tuberculosis*; *P.maltophilia*, *Pseudomonas maltophilia*; *P.aeruginosa*, *Pseudomonas aeruginosa*; RSV, respiratory syncytial virus.

### Multimodal data interconnection

The primary objective of the multimodal system was to elucidate associations and shared information across diverse modalities. Then we aimed to gain new insights into the AI-based diagnosis of pulmonary infections and potentially identify new biological signatures conducive to this process. To accomplish this, a spectrum of various fusion approaches was employed, including early fusion, intermediate fusion, and late fusion, and we conducted extensive experiments to evaluate their effectiveness (Figure S3).

In these experiments, cross-attention fusion methods were employed to amalgamate the image and clinical results into a single layer, thereby engendering multi-information, patient-level result features (Figure 3). The classic early fusion model achieved a mean AUC of 0.910 (95% CI: 0.904–0.916) coupled with 0.848 (95% CI: 0.838–0.856) accuracy in the internal testing dataset. It is noteworthy that the intermediate fusion approach yielded a preeminent AUC of 0.923 (95% CI: 0.919–0.927) and an accuracy of 0.870 (95% CI: 0.862–0.879). Similarly, the late fusion approach garnered an AUC of 0.917 (95% CI: 0.913–0.923) and an accuracy of 0.859 (95% CI: 0.852–0.868) (Figure S4; Table S4). Overall, the intermediate approach evinced superior performance compared with the classic early fusion and late fusion models in both validation cohorts for the infections identification tasks. These results highlighted the effectiveness of the intermediate fusion approach in integrating multimodal data and elevating the accuracy for infection identification.

### Comparison of the MMI system against physicians

We conducted a comparative study involving four board-certified physicians divided into two groups based on their experience (the junior group, consisting of physicians with less than 10 years of professional experience, and the senior group, consisting of physicians with over 10 years of experience). In order to ensure a fair comparison, all physicians were provided with a uniform set of in-

formation encompassing CT scans, demographic details, chief complaints, and laboratory assay results. The dataset comprised 400 cases including 94 cases of viral pneumonia, 55 cases of fungal pneumonia, 108 cases of bacterial pneumonia, and 143 cases of PTB. Each physician was charged with the independent assessment of whether patients had been diagnosed with one of the four distinct infectious diseases. Subsequently, their performance was juxtaposed with that of the MMI system. The results indicated that the AI system surpassed each junior physician and demonstrated performance comparable to the senior physicians (Figure 4). Furthermore, the superiority of the AI system's performance was evident numerically as well. When comparing the weighted errors in patient diagnosis between the AI system and the physicians, the AI system yielded 13.52%. Conversely, the range of weighted errors by expert physicians varied from 6.45% to 25.17%, with a mean of 8.98% for the senior group and 24.10% for the junior group (Table S5).

### Pathogen identification of pulmonary infections

Furthermore, the MMI system also had the capability to play a pivotal role in pinpointing specific pathogens to aid precision treatment decisions. Subset 3 covered a total of 11,375 CT scans from 2,520 patients, all of whom underwent molecular testing for a spectrum of 9 common respiratory viruses: influenza B virus, human metapneumovirus (HMPV), coronavirus, parainfluenza virus, respiratory syncytial virus (RSV), influenza A virus, H1N1pdm09, adenovirus, and rhinovirus. Subset 4 comprised 2,278 CT scans from 535 patients who had been diagnosed with 9 bacterial subtypes: methicillin-resistant *Staphylococcus aureus* (MRSA), *Mycobacterium tuberculosis*, *Pseudomonas maltophilia*, *Escherichia coli*, *Haemophilus influenzae*, *Klebsiella*, *Staphylococcus*, *Pseudomonas aeruginosa*, and *Acinetobacter baumannii*. This comprehensive testing approach ensured the accurate identification of pathogens. For the challenging task of discerning viruses and bacteria, the system utilized transfer learning alongside

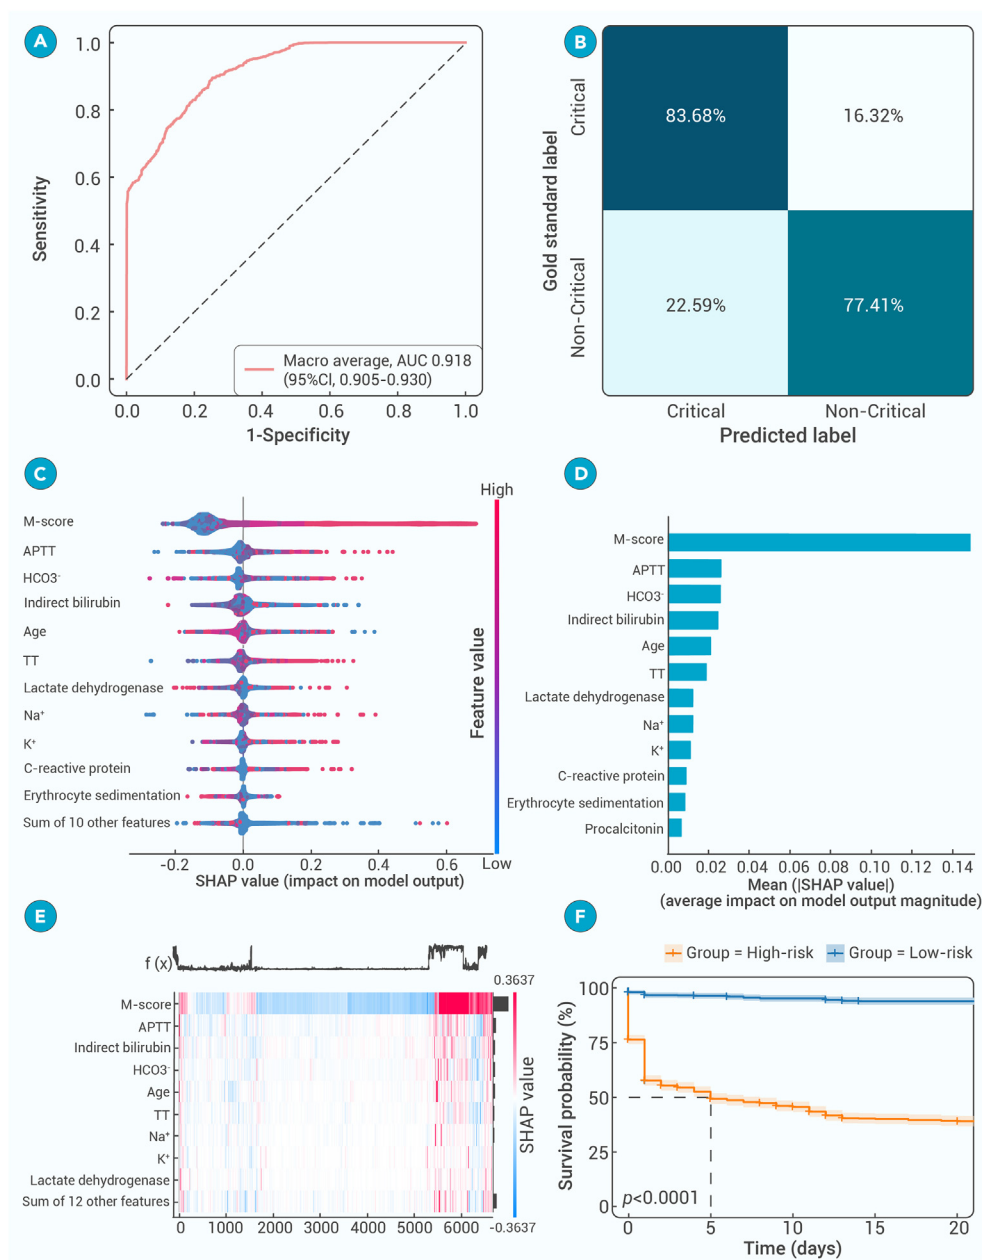

**Figure 6. Risk factors and clinical prognosis analysis for critical illness** (A) ROC for a binary classification of progression to critical illness in the internal testing dataset. (B) Diagnostic accuracy for critical illness progression prediction represented by a confusion matrix. (C and D) Predictive features for critical illness progression through Shapley Additive exPlanation (SHAP) value analysis. (E) Correlative analysis of predictive features influencing progression to critical illness. (F) When patients were stratified into high-risk and low-risk groups, the Kaplan-Meier curves demonstrated a significant difference in survival probabilities.

0.861) and 0.803 (95% CI: 0.775–0.830) on the validation and testing cohorts. The MMI system detected MRSA with an AUC exceeding 0.900. The MMI system could accurately distinguish among different bacteria subtypes based on CT images and clinical records, holding promise for aiding healthcare workers to make prompt and accurate diagnoses.

### Prognosis prediction for critical illness

Regarding more actual clinical deployment, the MMI system demonstrated extraordinary performance in identifying patients with severe pneumonia. The multimodal model exhibited a robust ability to differential among varying degrees of disease severity, with an AUC of 0.918 (95% CI: 0.905–0.930) in the internal testing dataset (Figures 6A and 6B), paving the way for a deeper understanding of the critical factors influencing disease prognosis. Then, through comprehensive analysis, we estimated the most influential factors that played a crucial role in the progression toward critical illness, emphasizing the necessity of considering multiple data dimensions when assessing patient outcomes (Figures 6C and 6D). Notably, non-quantized multimodal features score (M-score) played a significant role in predicting the progression to critical illness, aligning with existing research identifying them as determinants of disease outcomes. Liver biochemical markers, including albumin, serum lactate de-

hydrogenase (LDH), and indirect bilirubin, emerged as important prognostic indicators, elucidating the association between liver dysfunction and adverse clinical outcomes.<sup>42</sup> Coagulation markers, including thrombin time (TT), activated partial thromboplastin time (APTT), and platelet count, were also prognostic factors, reflecting disturbances in the coagulation system observed in critical illness.<sup>43</sup> Furthermore, markers related to electrolyte and acid-base balance, alongside inflammation markers including C-reactive protein, lymphocyte count, and neutrophil count, contributed significantly to predicting clinical prognosis, emphasizing their importance in assessing disease severity and predicting outcomes, and were consistent with previous research.<sup>44</sup>

These analyses revealed that clinical parameters and coagulation markers played complementary roles in prognosis, without significant correlations observed among the leading prognostic indicators (Figure 6E). In a specific clinical case, elevated levels of TT and indirect bilirubin levels were found to be associated with more severe outcomes. Notably, LDH and APTT factors were particularly valuable for predicting non-critical disease. The high-risk group, characterized by these prognostic markers, exhibited significantly lower survival probability than the low-risk group, with a statistically significant  $p$  value of less than 0.001 based on the log-rank test (Figure 6F). These findings not only reaffirmed the expansive capability of the multimodal model in

a pre-trained transformer architecture initially trained on different tasks involving four types of infections and then meticulously fine tuned on specific datasets to recognize the distinctive features and patterns indicative of pathogens from CT images and clinical records. The performance of the MMI system in accurately identifying viral infections from CT images was exceptional, as evidenced by its mean AUC score of 0.850 (95% CI: 0.839–0.859) on the validation set and 0.822 (95% CI: 0.805–0.837) on the testing set for the overall nine-way classification (Figures 5A and 5B). This remarkable performance underscored the high accuracy and reliability of the system in correctly identifying cases of viral pneumonia with minimal false positives. To gauge the discriminatory power of the model, we calculated the AUC for each viral subtype class, which quantified the ability of the MMI system to differentiate between viral pneumonia cases and other individuals, with AUC values spanning from 0.700 to 0.949 across the nine subgroups, which showcased its excellent capability to differentiate among the various virus subtypes.

By leveraging our multimodal AI system, we processed the CT images and generated predictions for the specific pathogen subtypes in each scan (Figures 5C and 5D). To evaluate the performance of our system across different bacterial subtypes, we utilized boxplot visualizations to juxtapose the AUC scores obtained from the system on both the validation cohort and testing cohort. The specific bacteria diagnostic system achieved an AUC of 0.847 (95% CI: 0.834–

hydrogenase (LDH), and indirect bilirubin, emerged as important prognostic indicators, elucidating the association between liver dysfunction and adverse clinical outcomes.<sup>42</sup> Coagulation markers, including thrombin time (TT), activated partial thromboplastin time (APTT), and platelet count, were also prognostic factors, reflecting disturbances in the coagulation system observed in critical illness.<sup>43</sup> Furthermore, markers related to electrolyte and acid-base balance, alongside inflammation markers including C-reactive protein, lymphocyte count, and neutrophil count, contributed significantly to predicting clinical prognosis, emphasizing their importance in assessing disease severity and predicting outcomes, and were consistent with previous research.<sup>44</sup>

These analyses revealed that clinical parameters and coagulation markers played complementary roles in prognosis, without significant correlations observed among the leading prognostic indicators (Figure 6E). In a specific clinical case, elevated levels of TT and indirect bilirubin levels were found to be associated with more severe outcomes. Notably, LDH and APTT factors were particularly valuable for predicting non-critical disease. The high-risk group, characterized by these prognostic markers, exhibited significantly lower survival probability than the low-risk group, with a statistically significant  $p$  value of less than 0.001 based on the log-rank test (Figure 6F). These findings not only reaffirmed the expansive capability of the multimodal model in



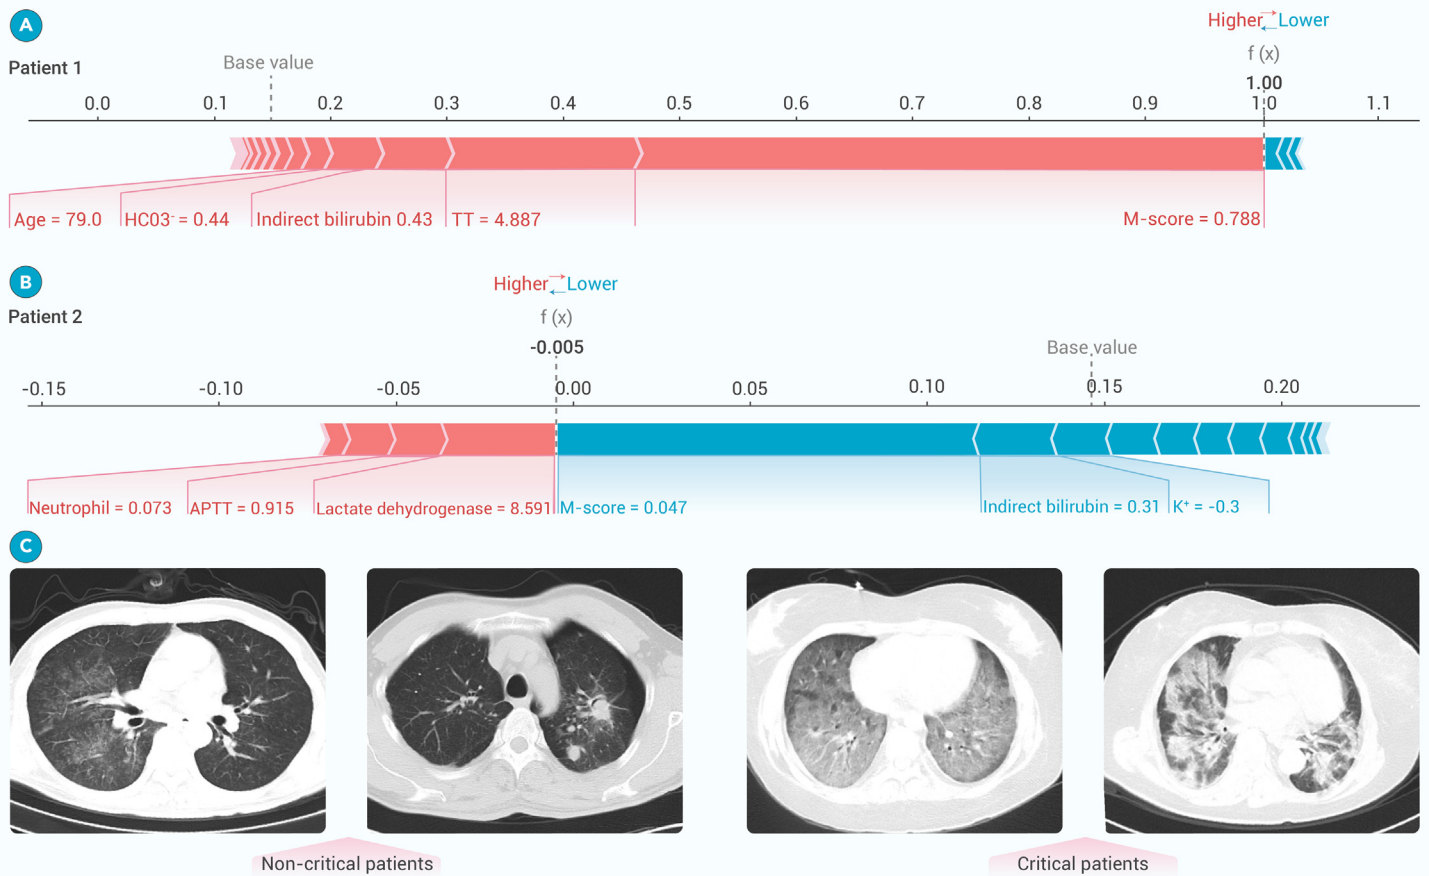

**Figure 7. Illustration of the AI system for prognosis estimation of pneumonia patients** (A and B) Real-world cases for prognostic evaluation. One patient with critical illness (patient 1) and the other with non-critical disease (patient 2), to demonstrate how lung lesion characteristics and clinical features serve as input variables to predict prognosis. The influence of these inputs on risk assessment was depicted, with pink indicators increasing the projected risk on the right and blue indicators decreasing it on the left. (C) Comparative CT scans of non-critical and critical pulmonary infection cases.

predicting critical illness but also pinpointed the specific markers pivotal for an accurate prognostic assessment using real-world examples (Figure 7). Although CT images in critically ill patients had shown specific manifestations, AI system recognized unique features that were previously unreadable to the human eye. These results indicated that accurate prognostic prediction required an integration of clinical data with lung lesion characteristics. This synergy enhanced our understanding and aided in the development of more accurate prognostic predictive tools.

## DISCUSSION

In this study, the MMI pipeline was constructed to facilitate accurate diagnosis of pulmonary infections based on a large-scale dataset and tested on an external cohort. Integrating radiological, clinical, and laboratory multimodal features, the MMI system enabled discriminative diagnosis of bacterial, fungal, and viral pneumonia and PTB. Meanwhile, a critical illness prediction model incorporating deep learning features and multidimensional parameters was established to provide timely intervention for high-risk patients. This pipeline is poised to significantly expedite the diagnostic process for pulmonary infectious diseases and mitigate the overall disease burden.

Pulmonary infections constitute a substantial global disease burden, epitomized by the high morbidity and mortality rates. Obstacles in ascertaining the pathogens lead to the misuse of antibiotics, thereby exacerbating the proliferation of drug-resistant bacteria.<sup>45</sup> Existing studies mostly focus on the diagnosis of specific pathogens, which is crucial for decision-making regarding specific types of pneumonia in pandemics.<sup>46–49</sup> A deep learning-based automated detection algorithm developed using 60,989 CXR scans was used to identify active PTB and performed better than human experts.<sup>50</sup> Another AI model based on a multicountry chest CT dataset automatically located the parietal pleura and lung parenchyma and

classified COVID-19 pneumonia patients with an accuracy of 90.8%.<sup>51</sup> However, there are still frequent types of pneumonia that require accurate and rapid diagnosis. A model based on 432 CT scans was developed to distinguish active PTB from community-acquired pneumonia.<sup>52</sup> Recently, the Pneumonia-Plus model based on a dataset of 2,763 patients was leveraged to identify bacterial, fungal, and viral pneumonia with a mean AUC of 0.822.<sup>53</sup> By contrast, our study has advanced the field by developing an AI model that not only broadens the spectrum of detectable diseases to include bacterial, fungal, and viral pneumonia and PTB but also achieves superior diagnostic precision with an elevated AUC of 0.910. Moreover, the MMI system precisely targeted frequent pneumonia pathogens, thus optimizing therapeutic interventions. Despite the constrained dataset of patients with partially pathogen-positive infections resulting in decent performance for pathogen prediction, these insights can still function as a critical reference for clinicians, guiding the decision-making for pathogen-specific treatments to enhance antibiotic efficacy.

Meanwhile, accurate disease diagnosis necessitates integrated multimodal data analysis, encompassing clinical features, imaging, and laboratory tests.<sup>25,54,55</sup> However, previous studies were often limited by the relatively small number of labeled samples.<sup>30,32</sup> Here, our approach entailed the construction of a multimodal fusion AI model, leveraging a substantial dataset, which yielded performance on par with advanced physicians. The MMI system architecture was refined based on IRENE, a transformer-based representation learning model with unified processing of multimodal input for clinical diagnostics.<sup>27</sup> Unprocessed laboratory test indicators, clinical complaints, demographic information (such as age and sex), and chest images were automatically coded and embedded. It demonstrated superior diagnostic accuracy for pulmonary diseases compared with the single-dimensional model (AUC: 0.887 vs. 0.840). In this study, this normalized multimodal fusion architecture was employed to

diagnose pulmonary infections, which also surpassed the performance of single-dimension models. The development of AI technologies, including large language models, heralds a future where medical AI models will incorporate a broader array of clinically significant multimodal data, such as breath sounds, thereby facilitating precise medical interventions.<sup>56–58</sup>

Then we compared three feature fusion strategies: early, late, and intermediate fusion. Different fusion architectures could affect the diagnostic efficiency of the model.<sup>59–61</sup> Early fusion utilized global information from different sources, providing a holistic feature representation. However, it may also introduce redundancy or inconsistency, given the crucial disparities among information sources, potentially overlooking unique information specific to each source. Late fusion preserved the independence of each information source, but it lacked the capacity to share global information during the feature extraction phase, potentially hindering the exploitation of local advantages from one source to another. In contrast, intermediate fusion sought to merge features from multiple sources during the feature extraction process, generating a unified feature set for the final classification. This approach enhanced information propagation among sources and interactively optimized the feature extraction process.<sup>60,61</sup> Moreover, a multi-stage fusion strategy was implemented in the proposed intermediate fusion architecture, allowing multimodal features to interact throughout the entire feature extraction process.

In addition, early warning of severe illness remains another tough challenge in the management of pulmonary infections. Previous studies have confirmed that radiomics could quantify the severity of pneumonia, and multiomics biomarkers, including clinical parameters, microbiome signatures, and radiomics, have been identified as prognostic indicators for patients with pneumonia.<sup>62–67</sup> For example, a regression model constructed with age, BMI, CD4<sup>+</sup> T lymphocytes, and serum interleukin-6 levels enabled effective prediction of the risk of developing severe disease in patients with viral pneumonia.<sup>62</sup> The presence of *Staphylococcus*, *Ralstonia*, and *Enterococcus* was strongly associated with acute respiratory distress syndrome by microbiome investigations.<sup>63</sup> Additionally, a neural network model based on CT images was utilized to assess disease severity in patients with viral pneumonia (AUC: 0.75).<sup>67</sup> The present study has pinpointed multiple risk factors from multimodal characteristics as potential predictors of severe pneumonia. The integration of diverse data sources will allow for a comprehensive approach to predicting critical illness, paving the way for effective risk stratification of patients and preemptive medical interventions.

Notably, co-infection with multiple pathogens increases the public health burden.<sup>68</sup> The present study provides an initial exploration of predicting co-infection, but the intricate mechanism by which mixed infections affect imaging performance remains unclear. The advent of single-cell technology makes it possible to unravel the dynamic interplays in the disease micro-environment, which may be a promising opportunity.<sup>69–73</sup> Several studies have elucidated that T cells and natural killer cells in patients with bacterial pneumonia complicated by sepsis exhibited activation and depletion characteristics, respectively, and that the proportion of plasma cells is significantly increased.<sup>71</sup> In contrast, cell subsets such as DC\_c4-LILRA4, B\_c05-MZB1-XBP1, and Neu\_c3-CST7 in viral pneumonia are closely associated with disease severity.<sup>72</sup> Furthermore, gene expression profiles have revealed distinct patterns: *CCL7*, *CCL8*, *CCL13*, and *IFIT2* are highly expressed in viral pneumonia, while *BAG3*, *HIF1A* and *IL1B* are upregulated in other types of pneumonia (including bacterial infections, etc.), and *CCL2*, *RNASE1*, and *MAFB* genes were highly expressed in different types of pneumonia.<sup>73</sup> These specific molecular events forge new insights for the deep excavation of biological mechanisms underpinning macroscopic imaging observations, providing a pivotal foundation for more nuanced diagnostic and therapeutic decision-making.

This study had several limitations that should be acknowledged. First, mixed infections present as a prevalent yet intricate challenge in clinical scenarios. We constructed a preliminary prediction model, but quantitative evaluation of mixed infections needs to be explored in conjunction with high-throughput molecular detection methods. Second, the practical application of AI models necessitates enhancements of both usability and accuracy. The integration of a predictive AI model with a clinical workflow must be seamless to achieve optimal results.<sup>74</sup> The existing models still require further optimization to meet the de-

mands of medical applications. Last but not the least, future research should focus on validating these findings using a broader range of central datasets, in this way reinforcing the generalizability of the AI system.

In summary, this study pioneered a multitask model based on multimodal clinical data from over 20,000 patients. The MMI system fused clinical, imaging, and laboratory assay features to diagnose various types of pulmonary infections and pathogens. It also incorporated key indicators to warn critically ill patients. This comprehensive approach could not only enhance the accuracy of diagnostics, but also guide the accurate use of medication in clinical settings. It holds the potential to evolve into a robust tool for precise interventions among patients with pulmonary infections, propelling the advancement into a new epoch of clinical care.

## MATERIALS AND METHODS

For materials and methods, see the supplemental information.

## REFERENCES

1. GBD 2021 Causes of Death Collaborators (2024). Global burden of 288 causes of death and life expectancy decomposition in 204 countries and territories and 811 subnational locations, 1990–2021: a systematic analysis for the Global Burden of Disease Study 2021. *Lancet* **403**: 2100–2132. [https://doi.org/10.1016/s0140-6736\(24\)00367-2](https://doi.org/10.1016/s0140-6736(24)00367-2).
2. GBD 2021 Diseases and Injuries Collaborators (2024). Global incidence, prevalence, years lived with disability (YLDs), disability-adjusted life-years (DALYs), and healthy life expectancy (HALE) for 371 diseases and injuries in 204 countries and territories and 811 subnational locations, 1990–2021: a systematic analysis for the Global Burden of Disease Study 2021. *Lancet* **403**: 2133–2161. [https://doi.org/10.1016/s0140-6736\(24\)00757-8](https://doi.org/10.1016/s0140-6736(24)00757-8).
3. Torres, A., Cilloniz, C., Niederman, M.S., et al. (2021). Pneumonia. *Nat. Rev. Dis. Primers* **7**(1): 25. <https://doi.org/10.1038/s41572-021-00259-0>.
4. World Health Organization (2022). Global Tuberculosis Report 2022.
5. Furin, J., Cox, H., and Pai, M. (2019). Tuberculosis. *Lancet* **393**(10181): 1642–1656. [https://doi.org/10.1016/s0140-6736\(19\)30308-3](https://doi.org/10.1016/s0140-6736(19)30308-3).
6. Jain, S., Self, W.H., Wunderink, R.G., et al. (2015). Community-acquired pneumonia requiring hospitalization among U.S. adults. *N. Engl. J. Med.* **373**(5): 415–427. <https://doi.org/10.1056/NEJMoa1500245>.
7. Yang, H., and Lu, S. (2020). COVID-19 and tuberculosis. *J. Transl. Int. Med.* **8**(2): 59–65. <https://doi.org/10.2478/jtim-2020-0010>.
8. Chen, X., and Hu, T.Y. (2021). Strategies for advanced personalized tuberculosis diagnosis: current technologies and clinical approaches. *Precis. Clin. Med.* **4**(1): 35–44. <https://doi.org/10.1093/pcmedi/pbaa041>.
9. Aliberti, S., Dela Cruz, C.S., Amati, F., et al. (2021). Community-acquired pneumonia. *Lancet* **398**(10303): 906–919. [https://doi.org/10.1016/s0140-6736\(21\)00630-9](https://doi.org/10.1016/s0140-6736(21)00630-9).
10. Cilloniz, C., Torres, A., and Niederman, M.S. (2021). Management of pneumonia in critically ill patients. *BMJ* **375**: 065871. <https://doi.org/10.1136/bmj-2021-065871>.
11. Musher, D.M., and Thorner, A.R. (2014). Community-acquired pneumonia. *N. Engl. J. Med.* **371**(17): 1619–1628.
12. Claessens, Y.E., Debray, M.P., Tubach, F., et al. (2015). Early chest computed tomography scan to assist diagnosis and guide treatment decision for suspected community-acquired pneumonia. *Am. J. Respir. Crit. Care Med.* **192**(8): 974–982. <https://doi.org/10.1164/rccm.201501-00170C>.
13. Péju, E., Belicard, F., Silva, S., et al. (2022). Management and outcomes of pregnant women admitted to intensive care unit for severe pneumonia related to SARS-CoV-2 infection: the multicenter and international COVIDPREG study. *Intensive Care Med.* **48**(9): 1185–1196. <https://doi.org/10.1007/s00134-022-06833-8>.
14. Singhal, K., Azizi, S., Tu, T., et al. (2023). Large language models encode clinical knowledge. *Nature* **620**(7972): 172–180. <https://doi.org/10.1038/s41586-023-06291-2>.
15. Bera, K., Braman, N., Gupta, A., et al. (2022). Predicting cancer outcomes with radiomics and artificial intelligence in radiology. *Nat. Rev. Clin. Oncol.* **19**(2): 132–146. <https://doi.org/10.1038/s41571-021-00560-7>.
16. Wong, F., de la Fuente-Nunez, C., and Collins, J.J. (2023). Leveraging artificial intelligence in the fight against infectious diseases. *Science* **381**(6654): 164–170. <https://doi.org/10.1126/science.adh1114>.
17. Theodosiou, A.A., and Read, R.C. (2023). Artificial intelligence, machine learning and deep learning: Potential resources for the infection clinician. *J. Infect.* **87**(4): 287–294. <https://doi.org/10.1016/j.jinf.2023.07.006>.
18. Shao, J., Feng, J., Li, J., et al. (2023). Novel tools for early diagnosis and precision treatment based on artificial intelligence. *Chin. Med. J. Pulm. Crit. Care Med.* **1**(3): 148–160. <https://doi.org/10.1016/j.pccm.2023.05.001>.
19. Esteve, A., Kuprel, B., Novoa, R.A., et al. (2017). Dermatologist-level classification of skin cancer with deep neural networks. *Nature* **542**(7639): 115–118. <https://doi.org/10.1038/nature21056>.
20. Kermany, D.S., Goldbaum, M., Cai, W., et al. (2018). Identifying medical diagnoses and treatable diseases by image-based deep learning. *Cell* **172**(5): 1122–1131. <https://doi.org/10.1016/j.cell.2018.02.010>.

21. Wang, C., Ma, J., Zhang, S., et al. (2022). Development and validation of an abnormality-derived deep-learning diagnostic system for major respiratory diseases. *NPJ Digit. Med.* **5**(1): 124. <https://doi.org/10.1038/s41746-022-00648-z>.
22. Zhang, S., Liu, X., Zhou, L., et al. (2023). Intelligent prognosis evaluation system for stage I-III resected non-small-cell lung cancer patients on CT images: a multi-center study. *eClinicalMedicine* **65**: 102270. <https://doi.org/10.1016/j.eclinm.2023.102270>.
23. Wang, C., Shao, J., Lv, J., et al. (2021). Deep learning for predicting subtype classification and survival of lung adenocarcinoma on computed tomography. *Transl. Oncol.* **14**(8): 101141. <https://doi.org/10.1016/j.tranon.2021.101141>.
24. Guo, Q., Wang, C., Guo, J., et al. (2023). The gap in the thickness: estimating effectiveness of pulmonary nodule detection in thick- and thin-section CT images with 3D deep neural networks. *Comput. Methods Programs Biomed.* **229**: 107290. <https://doi.org/10.1016/j.cmpb.2022.107290>.
25. Boehm, K.M., Khosravi, P., Vanguri, R., et al. (2022). Harnessing multimodal data integration to advance precision oncology. *Nat. Rev. Cancer* **22**(2): 114–126. <https://doi.org/10.1038/s41568-021-00408-3>.
26. Shao, J., Ma, J., Zhang, Q., et al. (2023). Predicting gene mutation status via artificial intelligence technologies based on multimodal integration (MMI) to advance precision oncology. *Semin. Cancer Biol.* **91**: 1–15. <https://doi.org/10.1016/j.semcancer.2023.02.006>.
27. Zhou, H.Y., Yu, Y., Wang, C., et al. (2023). A transformer-based representation-learning model with unified processing of multimodal input for clinical diagnostics. *Nat. Biomed. Eng.* **7**(6): 743–755. <https://doi.org/10.1038/s41551-023-01045-x>.
28. Li, J., Zhou, Y., Ma, J., et al. (2023). The long-term health outcomes, pathophysiological mechanisms and multidisciplinary management of long COVID. *Signal Transduct. Target. Ther.* **8**(1): 416. <https://doi.org/10.1038/s41392-023-01640-z>.
29. Wang, G., Liu, X., Shen, J., et al. (2021). A deep-learning pipeline for the diagnosis and discrimination of viral, non-viral and COVID-19 pneumonia from chest X-ray images. *Nat. Biomed. Eng.* **5**(6): 509–521. <https://doi.org/10.1038/s41551-021-00704-1>.
30. Lakhani, P., and Sundaram, B. (2017). Deep learning at chest radiography: automated classification of pulmonary tuberculosis by using convolutional neural networks. *Radiology* **284**(2): 574–582. <https://doi.org/10.1148/radiol.2017162326>.
31. Zhang, K., Liu, X., Shen, J., et al. (2020). Clinically applicable AI system for accurate diagnosis, quantitative measurements, and prognosis of COVID-19 pneumonia using computed tomography. *Cell* **181**(6): 1423–1433.e11. <https://doi.org/10.1016/j.cell.2020.04.045>.
32. Mei, X., Lee, H.C., Diao, K.Y., et al. (2020). Artificial intelligence-enabled rapid diagnosis of patients with COVID-19. *Nat. Med.* **26**(8): 1224–1228. <https://doi.org/10.1038/s41591-020-0931-3>.
33. Javaheri, T., Homayounfar, M., Amoozgar, Z., et al. (2021). CovidCTNet: an open-source deep learning approach to diagnose covid-19 using small cohort of CT images. *npj Digit. Med.* **4**(1): 29. <https://doi.org/10.1038/s41746-021-00399-3>.
34. Lessmann, N., Sánchez, C.I., Beenen, L., et al. (2021). Automated assessment of COVID-19 reporting and data system and chest CT severity scores in patients suspected of having COVID-19 using artificial intelligence. *Radiology* **298**(1): 18–28. <https://doi.org/10.1148/radiol.2020202439>.
35. Dayan, I., Roth, H.R., Zhong, A., et al. (2021). Federated learning for predicting clinical outcomes in patients with COVID-19. *Nat. Med.* **27**(10): 1735–1743. <https://doi.org/10.1038/s41591-021-01506-3>.
36. Wang, C., Wang, Z., Wang, G., et al. (2021). COVID-19 in early 2021: current status and looking forward. *Signal Transduct. Target. Ther.* **6**(1): 114. <https://doi.org/10.1038/s41392-021-00527-1>.
37. Zhan, Y., Wang, Y., Zhang, W., et al. (2022). Diagnostic accuracy of the artificial intelligence methods in medical imaging for pulmonary tuberculosis: a systematic review and meta-analysis. *J. Clin. Med.* **12**(1): 303. <https://doi.org/10.3390/jcm12010303>.
38. Devlin, J., Chang, M.W., Lee, K., et al. (2018). BERT: pre-training of deep bidirectional transformers for language understanding. Preprint at arXiv. <https://doi.org/10.48550/arXiv.1810.04805>.
39. Lan, Z., Chen, M., Goodman, S., et al. (2019). ALBERT: a lite BERT for self-supervised learning of language representations. Preprint at arXiv. <https://doi.org/10.48550/arXiv.1909.11942>.
40. He, K., Zhang, X., Ren, S., et al. (2016). Deep residual learning for image recognition. 2016 IEEE Conference on Computer Vision and Pattern Recognition (CVPR).
41. Liu, Z., Lin, Y., Cao, Y., et al. (2021). Swin Transformer: Hierarchical vision Transformer using shifted windows. In 2021 IEEE/CVF International Conference on Computer Vision (ICCV).
42. Wong, A.K.H., Woodhouse, I., Schneider, F., et al. (2021). Broad auto-reactive IgM responses are common in critically ill patients, including those with COVID-19. *Cell Rep. Med.* **2**(6): 100321. <https://doi.org/10.1016/j.xcrm.2021.100321>.
43. Terpos, E., Ntanasis-Stathopoulos, I., Elalamy, I., et al. (2020). Hematological findings and complications of COVID-19. *Am. J. Hematol.* **95**(7): 834–847. <https://doi.org/10.1002/ajh.25829>.
44. Wang, Y., Huang, X., Li, F., et al. (2023). Serum-integrated omics reveal the host response landscape for severe pediatric community-acquired pneumonia. *Crit. Care* **27**(1): 79. <https://doi.org/10.1186/s13054-023-04378-w>.
45. Antimicrobial Resistance Collaborators (2022). Global burden of bacterial antimicrobial resistance in 2019: a systematic analysis. *Lancet* **399**(10325): 629–655. [https://doi.org/10.1016/s0140-6736\(21\)02724-0](https://doi.org/10.1016/s0140-6736(21)02724-0).
46. Wu, Y., Qi, Q., Qi, S., et al. (2023). Classification of COVID-19 from community-acquired pneumonia: Boosting the performance with capsule network and maximum intensity projection image of CT scans. *Comput. Biol. Med.* **154**: 106567. <https://doi.org/10.1016/j.compbiomed.2023.106567>.
47. Meng, F., Kottlors, J., Shahzad, R., et al. (2023). AI support for accurate and fast radiological diagnosis of COVID-19: an international multicenter, multivendor CT study. *Eur. Radiol.* **33**(6): 4280–4291.
48. Loubet, P., Tubiana, S., Claessens, Y.E., et al. (2020). Community-acquired pneumonia in the emergency department: an algorithm to facilitate diagnosis and guide chest CT scan indication. *Clin. Microbiol. Infect.* **26**(3): 382.e1–382.e7. <https://doi.org/10.1016/j.cmi.2019.06.026>.
49. Wang, M., Xia, C., Huang, L., et al. (2020). Deep learning-based triage and analysis of lesion burden for COVID-19: a retrospective study with external validation. *Lancet Digit. Health* **2**(10): 506–515. [https://doi.org/10.1016/s2589-7500\(20\)30199-0](https://doi.org/10.1016/s2589-7500(20)30199-0).
50. Hwang, E.J., Park, S., Jin, K.N., et al. (2019). Development and validation of a deep learning-based automatic detection algorithm for active pulmonary tuberculosis on chest radiographs. *Clin. Infect. Dis.* **69**(5): 739–747. <https://doi.org/10.1093/cid/ciy967>.
51. Harmon, S.A., Sanford, T.H., Xu, S., et al. (2020). Artificial intelligence for the detection of COVID-19 pneumonia on chest CT using multinational datasets. *Nat. Commun.* **11**(1): 4080. <https://doi.org/10.1038/s41467-020-17971-2>.
52. Han, D., Chen, Y., Li, X., et al. (2023). Development and validation of a 3D-convolutional neural network model based on chest CT for differentiating active pulmonary tuberculosis from community-acquired pneumonia. *Radiol. Med.* **128**(1): 68–80. <https://doi.org/10.1007/s11547-022-01580-8>.
53. Jiang, F., Li, X., Wen, R., et al. (2023). Pneumonia-Plus: a deep learning model for the classification of bacterial, fungal, and viral pneumonia based on CT tomography. *Eur. Radiol.* **33**(12): 8869–8878. <https://doi.org/10.1007/s00330-023-09833-4>.
54. Lipkova, J., Chen, R.J., Chen, B., et al. (2022). Artificial intelligence for multimodal data integration in oncology. *Cancer Cell* **40**(10): 1095–1110. <https://doi.org/10.1016/j.ccell.2022.09.012>.
55. Sammut, S.J., Crispin-Ortuzar, M., Chin, S.F., et al. (2022). Multi-omic machine learning predictor of breast cancer therapy response. *Nature* **601**(7894): 623–629. <https://doi.org/10.1038/s41586-021-04278-5>.
56. Jiang, L.Y., Liu, X.C., Nejatian, N.P., et al. (2023). Health system-scale language models are all-purpose prediction engines. *Nature* **619**(7969): 357–362. <https://doi.org/10.1038/s41586-023-06160-y>.
57. Heitmann, J., Glangetas, A., Doenz, J., et al. (2023). DeepBreath-automated detection of respiratory pathology from lung auscultation in 572 pediatric outpatients across 5 countries. *NPJ Digit. Med.* **6**(1): 104. <https://doi.org/10.1038/s41746-023-00838-3>.
58. Moor, M., Banerjee, O., Abad, Z.S.H., et al. (2023). Foundation models for generalist medical artificial intelligence. *Nature* **616**(7956): 259–265. <https://doi.org/10.1038/s41586-023-05881-4>.
59. Baltrusaitis, T., Ahuja, C., and Morency, L.P. (2019). Multimodal machine learning: a survey and taxonomy. *IEEE Trans. Pattern Anal. Mach. Intell.* **41**(2): 423–443. <https://doi.org/10.1109/tpami.2018.2798607>.
60. Zitnik, M., Nguyen, F., Wang, B., et al. (2019). Machine learning for integrating data in biology and medicine: principles, practice, and opportunities. *Inf. Fusion* **50**: 71–91. <https://doi.org/10.1016/j.inffus.2018.09.012>.
61. Huang, T., Xu, H., Wang, H., et al. (2023). Artificial intelligence for medicine: progress, challenges, and perspectives. *Innovat. Med.* **1**(2): 100030. <https://doi.org/10.59717/j.xinnmed.2023.100030>.
62. Chen, C., Wang, H., Liang, Z., et al. (2020). Predicting illness severity and short-term outcomes of COVID-19: a retrospective cohort study in China. *Innovation* **1**(1): 100007. <https://doi.org/10.1016/j.xinn.2020.04.007>.
63. Montassier, E., Kitsios, G.D., Radder, J.E., et al. (2023). Robust airway microbiome signatures in acute respiratory failure and hospital-acquired pneumonia. *Nat. Med.* **29**(11): 2793–2804. <https://doi.org/10.1038/s41591-023-02617-9>.
64. Chouchane, O., Schuurman, A.R., Reijnders, T.D.Y., et al. (2024). The plasma lipidomic landscape in patients with sepsis due to community-acquired pneumonia. *Am. J. Respir. Crit. Care Med.* **209**(8): 973–986. <https://doi.org/10.1164/rccm.202308-1321OC>.
65. Ning, W., Lei, S., Yang, J., et al. (2020). Open resource of clinical data from patients with pneumonia for the prediction of COVID-19 outcomes via deep learning. *Nat. Biomed. Eng.* **4**(12): 1197–1207. <https://doi.org/10.1038/s41551-020-00633-5>.
66. Byeon, S.K., Madugundu, A.K., Garapati, K., et al. (2022). Development of a multiomics model for identification of predictive biomarkers for COVID-19 severity: a retrospective cohort study. *Lancet Digit. Health* **4**(9): 632–645. [https://doi.org/10.1016/s2589-7500\(22\)00112-1](https://doi.org/10.1016/s2589-7500(22)00112-1).
67. Lassau, N., Ammari, S., Chouzenoux, E., et al. (2021). Integrating deep learning CT-scan model, biological and clinical variables to predict severity of COVID-19 patients. *Nat. Commun.* **12**(1): 634. <https://doi.org/10.1038/s41467-020-20657-4>.
68. Yang, J., Gong, Y., Zhang, C., et al. (2022). Co-existence and co-infection of influenza A viruses and coronaviruses: public health challenges. *Innovation* **3**(5): 100306. <https://doi.org/10.1016/j.xinn.2022.100306>.
69. Silvin, A., Chapuis, N., Dunsmore, G., et al. (2020). Elevated calprotectin and abnormal myeloid cell subsets discriminate severe from mild COVID-19. *Cell* **182**(6): 1401–1418.e18. <https://doi.org/10.1016/j.cell.2020.08.002>.
70. Melms, J.C., Biermann, J., Huang, H., et al. (2021). A molecular single-cell lung atlas of lethal COVID-19. *Nature* **595**(7865): 114–119. <https://doi.org/10.1038/s41586-021-03569-1>.
71. Wang, T., Zhang, X., Liu, Z., et al. (2021). Single-cell RNA sequencing reveals the sustained immune cell dysfunction in the pathogenesis of sepsis secondary to bacterial pneumonia. *Genomics* **113**(3): 1219–1233. <https://doi.org/10.1016/j.ygeno.2021.01.026>.

72. Ren, X., Wen, W., Fan, X., et al. (2021). COVID-19 immune features revealed by a large-scale single-cell transcriptome atlas. *Cell* **184**(23): 5838. <https://doi.org/10.1016/j.cell.2021.10.023>.
73. Grant, R.A., Morales-Nebreda, L., Markov, N.S., et al. (2021). Circuits between infected macrophages and T cells in SARS-CoV-2 pneumonia. *Nature* **590**(7847): 635–641. <https://doi.org/10.1038/s41586-020-03148-w>.
74. Dvijotham, K.D., Winkens, J., Barsbey, M., et al. (2023). Enhancing the reliability and accuracy of AI-enabled diagnosis via complementarity-driven deferral to clinicians. *Nat. Med.* **29**(7): 1814–1820. <https://doi.org/10.1038/s41591-023-02437-x>.

#### ACKNOWLEDGMENTS

This research was supported by the National Natural Science Foundation of China (82341083, 82100119), the Science and Technology Project of Sichuan (2020YFG0473, 2022ZDZX0018), the Beijing Municipal Science and Technology Planning Project (Z211100003521009), Hong Kong Research Grants Council through General Research Fund (Grant 17207722), the Sichuan University from "0" to "1" Innovation Project (2023SCUH0051), and the 1.3.5 Project for Disciplines Excellence of West China Hospital, Sichuan University (ZYXC23027).

#### AUTHOR CONTRIBUTIONS

C.W. conceived the idea and designed the experiments. J.S., J.M., Y.Y., S.Z., and W.L. implemented and performed the experiments. J.S., J.M., W.W., and C.W. analyzed the data and experimental results. J.S., J.M., and C.W. wrote the paper. All authors commented on the paper.

#### DECLARATION OF INTERESTS

The authors declare no competing interests.

#### SUPPLEMENTAL INFORMATION

It can be found online at <https://doi.org/10.1016/j.xinn.2024.100648>.

#### LEAD CONTACT WEBSITE

<https://yjs.cd120.com/contents/498/1777.html>.

**The Innovation, Volume 5**

**Supplemental Information**

**A multimodal integration pipeline for accurate diagnosis, pathogen identification, and prognosis prediction of pulmonary infections**

**Jun Shao, Jiechao Ma, Yizhou Yu, Shu Zhang, Wenyang Wang, Weimin Li, and Chengdi Wang**

# Supplemental Information

## **A multimodal integration pipeline for accurate diagnosis, pathogen identification, and prognosis prediction of pulmonary infections**

Jun Shao, Jiechao Ma, Yizhou Yu, Shu Zhang, Wenyang Wang, Weimin Li, Chengdi Wang

### Table of Contents

**Figure S1.** Overview of patient selection and data categorization.

**Figure S2.** Performance of the MMI system for identifying four categories pneumonia in the internal testing set.

**Figure S3.** Multimodal data fusion architecture.

**Figure S4.** Performance of different fusion methods in the validation and internal testing datasets.

**Supplementary Table 1.** Summary of clinical characteristics of enrolled patients for the training, validation, internal testing and external testing datasets.

**Supplementary Table 2.** Performance of MMI system in identifying pulmonary infections.

**Supplementary Table 3.** Performance of MMI system in identifying single infection and mixed infections.

**Supplementary Table 4.** Performance of MMI system in identifying various pulmonary infections based on different fusion methods.

**Supplementary Table 5.** Weighted error results of the MMI system vs. physicians in diagnosing pulmonary infections.

**Supplementary Table 6.** Performance of different architectures in identifying pulmonary infections.

### **MATERIALS AND METHODS**

Data acquisition

Pre-processing

Microbiological analysis

Schema design

Diagnosis system and network architectures

NLP model development

Multimodal data fusion

Network training strategy

Comparison of AI and physicians

Prognosis analysis for integrating multimodal features

Quantification and statistical analysis

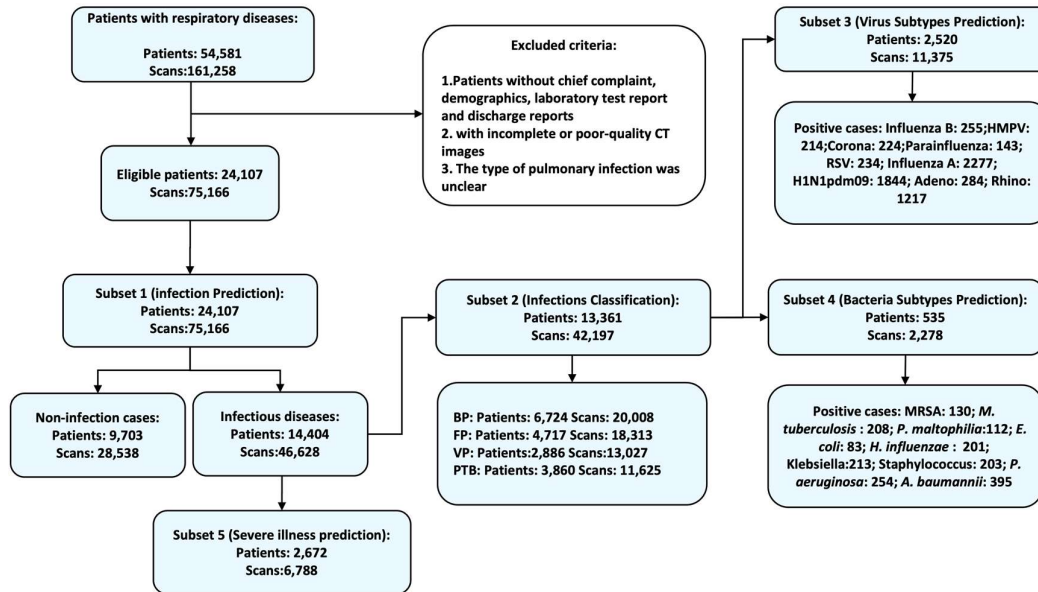

**Figure S1. Overview of patient selection and data categorization.** The study flow diagram presented the screening and categorization of patients with respiratory conditions at West China Hospital of Sichuan University and Chengdu ShangJin Nanfu Hospital. The process involved exclusion criteria application, resulting in 24,107 eligible patients. Data were subdivided for various analyses: primary prediction of respiratory diseases, classification of infections, virus and bacteria prediction, and severe pneumonia identification.

Abbreviations: *A.baumannii*, *Acinetobacter baumannii*; BP, bacterial pneumonia; *E.coli*, *Escherichia coli*; FP, fungal pneumonia; HMPV, human metapneumovirus; *H.influenzae*, *Haemophilus influenzae*; MRSA, Methicillin-resistant *Staphylococcus aureus*; *M.tuberculosis*, *Mycobacterium tuberculosis*; *P.maltophilia*, *Pseudomonas maltophilia*; *P.aeruginosa*, *Pseudomonasaeruginosa*; PTB, pulmonary tuberculosis; RSV, respiratory syncytial virus; VP, viral pneumonia.

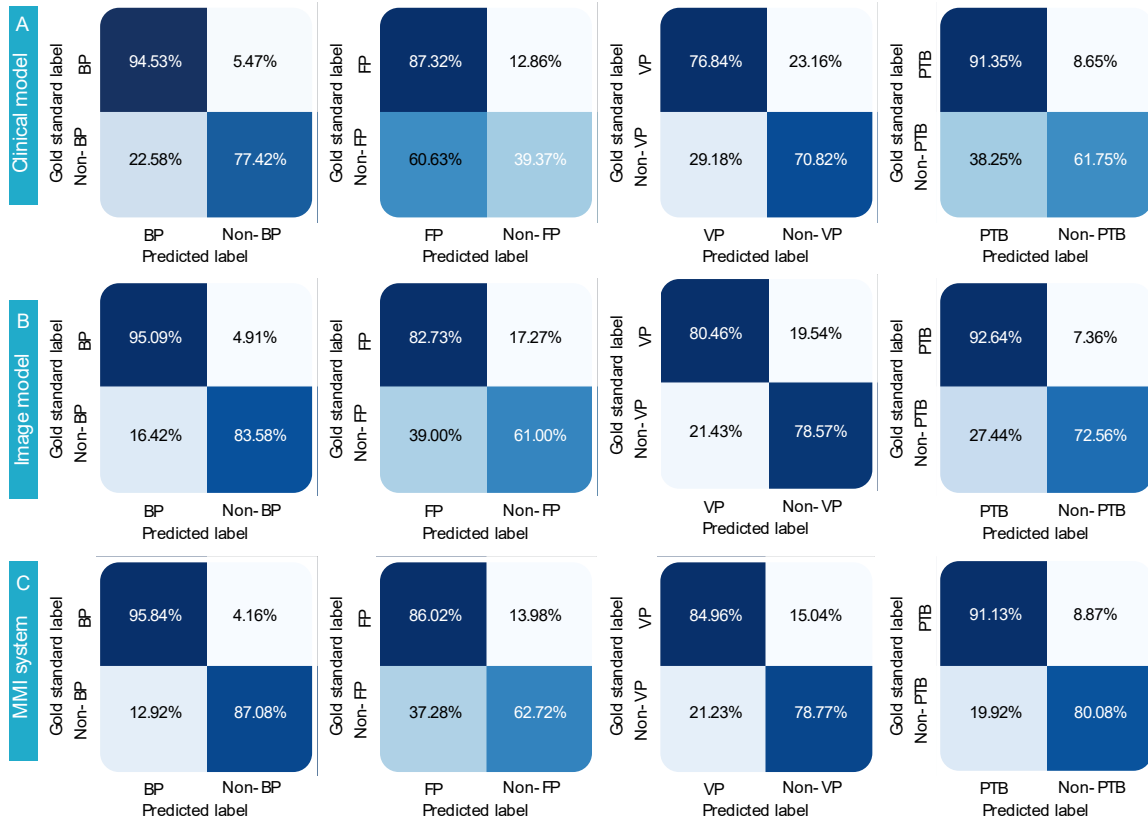

**Figure S2 | Performance of the MMI system for identifying four categories pneumonia in the internal testing sets. A-C, The confusion matrix for identifying pneumonia based on clinical model (A), image model (B) and MMI system (C) in the internal testing set.**

Abbreviations: BP, bacterial pneumonia; FP, fungal pneumonia; MMI, multimodal integration; PTB, pulmonary tuberculosis; VP, viral pneumonia.



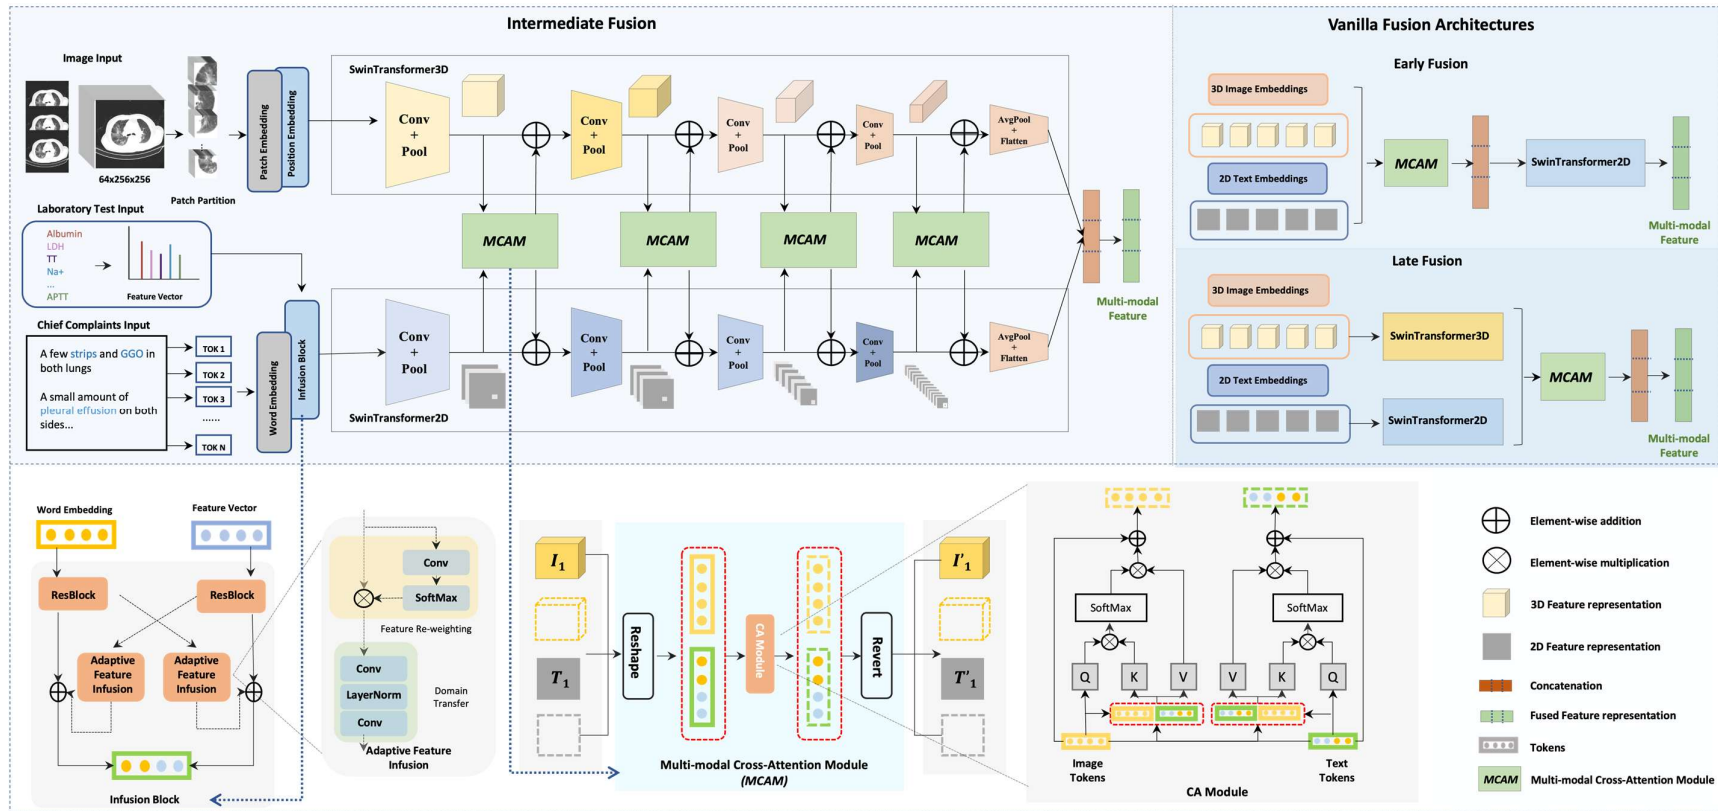

**Figure S3 | Multimodal data fusion architecture.** Upper left panel: Pre-processing and feature extraction stages for image, laboratory, and clinical text data inputs using Swin-Transformers and convolutional operations. Upper right panel: Depiction of the fusion process utilizing the Multimodal Cross-Attention Modules (MCAM), comparing early and late fusion methodologies. Lower panel: Detailed internal structure of the MCAM.

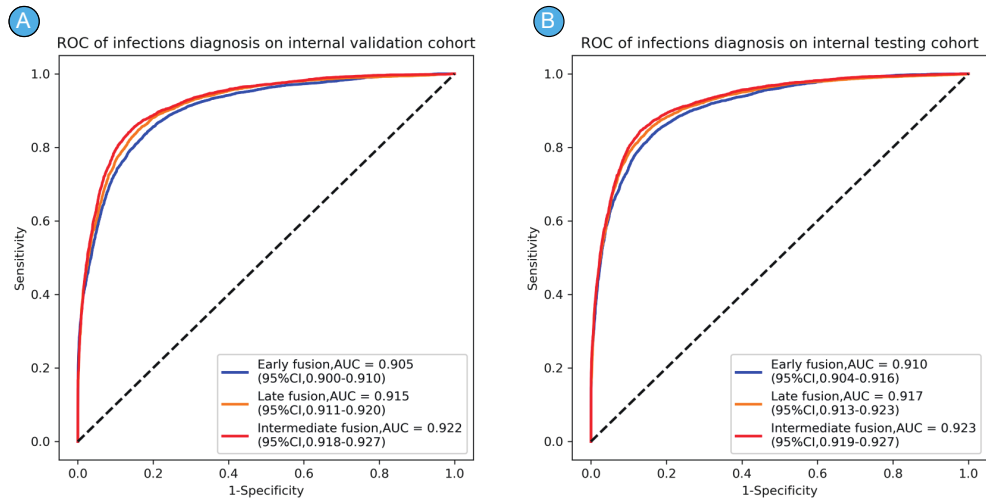

**Figure S4 | Performance of different fusion methods in the validation and internal testing datasets. A-B,** The ROC curves of different fusion methods for identifying pulmonary infections in internal validation cohort (**A**) and internal testing cohort (**B**).

**Supplementary Table 1. Summary of clinical characteristics of enrolled patients for the training, validation, internal testing and external testing datasets.**

| <b>Subset 1 (N=24,107)</b> |                                |                                 |                                       |                                     |
|----------------------------|--------------------------------|---------------------------------|---------------------------------------|-------------------------------------|
| <b>Demographics</b>        | <b>Training<br/>(N=19,046)</b> | <b>Validation<br/>(N=2,432)</b> | <b>Internal Testing<br/>(N=2,433)</b> | <b>External Testing<br/>(N=196)</b> |
| <b>Age (years)</b>         | 55.53±18.99                    | 56.21±19.00                     | 56.09±18.72                           | 57.71±19.43                         |
| <b>Sex (male)</b>          | 11,620(61.0%)                  | 1,449(59.6%)                    | 1,464(60.2%)                          | 112(57.1%)                          |
| <b>Scans</b>               | 59,490                         | 7,497                           | 7,554                                 | 625                                 |
| <b>Infections</b>          |                                |                                 |                                       |                                     |
| Yes                        | 11,439(60.1%)                  | 1,389(57.1%)                    | 1,422(58.4%)                          | 154(78.6%)                          |
| No                         | 7,607(39.9%)                   | 1,043(42.9%)                    | 1,011(41.6%)                          | 42(21.4%)                           |
| <b>Subset 2 (N=13,361)</b> |                                |                                 |                                       |                                     |
| <b>Demographics</b>        | <b>Training<br/>(N=10,578)</b> | <b>Validation<br/>(N=1,325)</b> | <b>Internal Testing<br/>(N=1,325)</b> | <b>External Testing<br/>(N=133)</b> |
| <b>Age (years)</b>         | 52.33±20.07                    | 52.67±20.07                     | 52.34±20.03                           | 53.13±19.12                         |
| <b>Sex (male)</b>          | 6,391(60.0%)                   | 801(60.5%)                      | 774(58.4%)                            | 79(59.4%)                           |
| <b>Scans</b>               | 33,411                         | 4,267                           | 4,094                                 | 425                                 |
| <b>Infections types</b>    |                                |                                 |                                       |                                     |
| BP                         | 5,278(49.5%)                   | 686(51.8%)                      | 688(51.9%)                            | 72(54.1%)                           |
| FP                         | 3,702(35.7%)                   | 484(36.5%)                      | 480(36.2%)                            | 51(38.3%)                           |
| VP                         | 2,321(21.8%)                   | 266(20.1%)                      | 270(20.4%)                            | 29(21.8%)                           |
| PTB                        | 3,103(29.1%)                   | 370(27.9%)                      | 355(26.8%)                            | 32(24.1%)                           |

Abbreviations: BP, bacterial pneumonia; FP, fungal pneumonia; VP, viral pneumonia; PTB, pulmonary tuberculosis.

**Supplementary Table 2. Performance of MMI system in identifying pulmonary infections.**

|                       | Datasets         | Sensitivity<br>(95%CI) | Specificity<br>(95%CI) | Accuracy<br>(95%CI) | AUC<br>(95%CI)     |
|-----------------------|------------------|------------------------|------------------------|---------------------|--------------------|
|                       | Validation       | 0.808(0.797–0.818)     | 0.765(0.754–0.779)     | 0.782(0.775–0.790)  | 0.868(0.861–0.875) |
| <b>Clinical model</b> | Internal testing | 0.787(0.776–0.798)     | 0.795(0.784–0.806)     | 0.792(0.784–0.800)  | 0.879(0.870–0.885) |
|                       | External testing | 0.624(0.582–0.685)     | 0.775(0.732–0.822)     | 0.692(0.665–0.735)  | 0.770(0.737–0.815) |
|                       | Validation       | 0.852(0.841–0.862)     | 0.831(0.819–0.842)     | 0.835(0.828–0.842)  | 0.918(0.913–0.923) |
| <b>Image model</b>    | Internal testing | 0.845(0.836–0.855)     | 0.848(0.839–0.857)     | 0.836(0.830–0.842)  | 0.926(0.922–0.930) |
|                       | External testing | 0.770(0.721–0.815)     | 0.777(0.732–0.821)     | 0.759(0.736–0.791)  | 0.830(0.792–0.867) |
|                       | Validation       | 0.864(0.855–0.872)     | 0.840(0.829–0.849)     | 0.846(0.839–0.852)  | 0.930(0.925–0.934) |
| <b>MMI system</b>     | Internal testing | 0.866(0.857–0.874)     | 0.838(0.829–0.848)     | 0.849(0.844–0.855)  | 0.935(0.932–0.939) |
|                       | External testing | 0.852(0.813–0.889)     | 0.853(0.814–0.891)     | 0.919(0.898–0.937)  | 0.888(0.856–0.916) |

**Supplementary Table 3. Performance of MMI system in identifying single infection and mixed infections.**

---

|                             | <b>Datasets</b>  | <b>Sensitivity<br/>(95% CI)</b> | <b>Specificity<br/>(95% CI)</b> | <b>Accuracy<br/>(95% CI)</b> | <b>AUC<br/>(95% CI)</b> |
|-----------------------------|------------------|---------------------------------|---------------------------------|------------------------------|-------------------------|
| <b>Single<br/>infection</b> | Internal testing | 0.864(0.841–0.890)              | 0.915(0.906–0.924)              | 0.904(0.895–0.912)           | 0.949(0.943–0.954)      |
| <b>Mixed<br/>infections</b> | Internal testing | 0.864(0.836–0.896)              | 0.765(0.728–0.805)              | 0.852(0.837–0.868)           | 0.876(0.861–0.890)      |

---

**Supplementary Table 4. Performance of MMI system in identifying various pulmonary infections based on different fusion methods.**

|                            | <b>Datasets</b>  | <b>Sensitivity<br/>(95%CI)</b> | <b>Specificity<br/>(95%CI)</b> | <b>Accuracy<br/>(95%CI)</b> | <b>AUC<br/>(95%CI)</b> |
|----------------------------|------------------|--------------------------------|--------------------------------|-----------------------------|------------------------|
| <b>Early fusion</b>        | Validation       | 0.836(0.820–0.853)             | 0.850(0.840–0.861)             | 0.846(0.838–0.855)          | 0.905(0.900–0.910)     |
|                            | Internal testing | 0.846(0.830–0.860)             | 0.847(0.837–0.858)             | 0.848(0.838–0.856)          | 0.910(0.904–0.916)     |
| <b>Intermediate fusion</b> | Validation       | 0.852(0.838–0.868)             | 0.879(0.869–0.889)             | 0.870(0.862–0.879)          | 0.922(0.918–0.927)     |
|                            | Internal testing | 0.849(0.833–0.863)             | 0.882(0.874–0.892)             | 0.870(0.862–0.879)          | 0.923(0.919–0.927)     |
| <b>Late fusion</b>         | Validation       | 0.867(0.852–0.883)             | 0.842(0.832–0.853)             | 0.851(0.843–0.860)          | 0.915(0.911–0.920)     |
|                            | Internal testing | 0.849(0.834–0.863)             | 0.865(0.856–0.875)             | 0.859(0.852–0.868)          | 0.917(0.913–0.923)     |

**Supplementary Table 5. Weighted error results of the MMI system vs. physicians in diagnosing pulmonary infections.**

| <b>Weighted errors</b> | <b>Junior physicians</b> | <b>Senior physicians</b> | <b>MMI system</b> |
|------------------------|--------------------------|--------------------------|-------------------|
| <b>Mean</b>            | 24.10%                   | 8.98%                    | 13.52%            |
| <b>Physician 1</b>     | 23.03%                   | 11.51%                   | -                 |
| <b>Physician 2</b>     | 25.17%                   | 6.45%                    | -                 |

**Supplementary Table 6. Performance of different architectures in identifying pulmonary infections.**

|                                           | <b>Sensitivity<br/>(95%CI)</b> | <b>Specificity<br/>(95%CI)</b> | <b>Accuracy<br/>(95%CI)</b> | <b>AUC<br/>(95%CI)</b> |
|-------------------------------------------|--------------------------------|--------------------------------|-----------------------------|------------------------|
| <b>ResNet</b>                             | 0.793(0.782–0.806)             | 0.787(0.776–0.799)             | 0.786(0.778–0.794)          | 0.873(0.867–0.879)     |
| <b>DenseNet</b>                           | 0.909(0.902–0.917)             | 0.745(0.735–0.753)             | 0.803(0.797–0.809)          | 0.881(0.877–0.886)     |
| <b>Swin-Transformer</b>                   | 0.832(0.822–0.842)             | 0.849(0.840–0.859)             | 0.829(0.823–0.836)          | 0.927(0.923–0.931)     |
| <b>Swin-Transformer with cross-shaped</b> | 0.866(0.857–0.874)             | 0.838(0.829–0.848)             | 0.849(0.844–0.855)          | 0.935(0.932–0.939)     |



## **MATERIALS AND METHODS**

### **Data acquisition**

In this study, a comprehensive analysis was conducted utilizing data from hospitalized inpatients who were admitted to West China Hospital (WCH) of Sichuan University and Chengdu ShangJin Nanfu Hospital (CSJH). The inclusion criteria were as follows: (1) over the age of 18 years old; (2) with clear diagnosis regarding the presence or absence of pulmonary infection; (3) with complete medical information, inclusive of chest CT scans. The exclusion criteria were as follows: (1) patients without chief complaint, demographics, laboratory test reports and discharge reports; (2) with incomplete or poor-quality CT images, such as scans < 25 slices, motion artifacts or significant resolution reductions; (3) the type of pulmonary infection was unclear. The studies involving human participants were reviewed and approved by the Institutional Review Board and Ethics Committee of West China Hospital.

The dataset consisted of CT images acquired in the axial direction at a resolution of 512×512 pixels. The slice spacing varied ranged from 0.625 to 5 mm. These images were procured utilizing apparatuses furnished by illustrious entities such as Philips, GE Healthcare, United Imaging, and Siemens Healthineers. During the CT examinations, a tube voltage of 120 kilovolts peak (kVp) was consistently employed. To optimize image quality and minimize radiation exposure, an automatic tube current modulation technique was employed to modulate the tube current. The range of the tube currents used was 30 to 70 milliamperes (mAs). A stringent quality control procedure was implemented to ensure the integrity and reliability of the collected data.

### **Pre-processing**

Furthermore, to ensure uniformity and enhance the quality of the CT scans, standardized image pre-processing protocols were instituted. These corrective interventions were enacted to attenuate any potential variations or biases resulting from the imaging process or equipment used. This study adopted a two-step process for analysing the CT scans obtained during the same patient admission, with a specific focus on the chest sequences. First, an evaluation of the convolution kernel utilized to fabricate each set of CT scans was conducted. This analysis aimed to elucidate and compensate for the variations or disparities stemming from the specific convolution kernel utilized. To ensure optimal resolution, all radiographs were initially screened, eliminating low-quality scans or discontinuities. Subsequently, all the continuous DICOM sequences were merged to generate a cohesive three-dimensional (3D) volume representation of the scans.<sup>75</sup> This merging process allowed the consolidation of

multiple sequences into a single comprehensive dataset. To meet the input requirements of the model, the dimensions of the resulting 3D volume were modified to  $64 \times 256 \times 256$ . This resizing ensured compatibility and consistency across all the scans. By adhering to these protocols, the objective was to standardize the data and prepare it for further analysis, thereby guaranteeing that the input to the model remained uniform while focusing on the chest region.

In contrast, clinical text data of each patient were extensively collected. This comprehensive dataset encompassed a myriad of aspects concerning patient health records. Basic demographic information was assembled such as age, sex, and the highest body temperature recorded at the time of admission. Furthermore, the chief complaints reported by the patients upon admission were diligently documented providing insight into their specific symptoms or concerns. This information provided a rich contextual backdrop for analyzing their health conditions. In addition to the patient demographic details and chief complaints, their laboratory test results were also collected. These laboratory test results covered various markers pertaining to different aspects of health evaluation. For instance, liver biochemical markers, including albumin, serum lactic dehydrogenase (LDH), and indirect bilirubin were recorded. Moreover, coagulation markers such as thrombin time (TT), activated partial thromboplastin time (APTT), and platelet count were analyzed. These markers provided insights into the blood coagulation abilities and potential clotting disorders. To acquire a holistic view of the patients' health status, electrolyte and acid-base balance markers were also recorded such as  $\text{Na}^+$ ,  $\text{K}^+$ , and  $\text{HCO}_3^-$ . These markers were instrumental in assessing the patients' overall electrolyte levels and acid-base equilibrium. To assess the inflammatory response, inflammatory markers were incorporated into the dataset. These included C-reactive protein (CRP) level, white blood cell count, lymphocyte count, and neutrophil count. Additionally, procalcitonin (PCT) and interleukin 6 (IL-6) levels as indicators of inflammation were measured, which provided insightful information regarding the patients' immune responses.

In the pre-processing of the structured data, a normalized approach was employed to capture and quantify over 50 factors that played a role in determining whether a patient had severe pneumonia. For the laboratory data, a median imputation technique was utilized to address missing values within the factors. When the missing rate for a specific marker was more than 50%, the factor was either excluded, its influence significantly diminished, or compensation for the absent markers was applied. By leveraging the median values of the available data for a particular marker, the missing values were effectively imputed, ensuring that the dataset remained as complete as possible for subsequent analysis. This approach helped mitigate the potential biases

introduced by missing data and preserved the integrity and comprehensiveness of the dataset. On the other hand, when it came to unstructured data such as the chief complaints recorded in free-text format, a robust natural language processing (NLP) algorithm was leveraged to extract the corresponding tokens. This NLP algorithm was able to process and parse the textual data, extracting relevant information and converting it into a structured format suitable for further analysis. By employing this NLP technique, the unstructured data was effectively harnessed, extracting valuable insights to augment the analysis. By combining a normalized approach for structured data and leveraging NLP algorithms for unstructured data,<sup>76</sup> the accuracy and completeness of the clinical record dataset information was ensured.

### **Microbiological analysis**

To thoroughly investigate the various types of pulmonary infections in this study, the laboratory test results and benchmarked clinical diagnosis were comprehensively analyzed as the gold standard. To diagnose the specific viral subtypes, nucleic acid tests for respiratory pathogens were executed. These tests facilitated the discernment of an array of respiratory viruses, including influenza B virus, human metapneumovirus (HMPV), coronavirus, parainfluenza virus, respiratory syncytial virus (RSV), influenza A virus, H1N1pdm09, adenovirus, and rhinovirus. Similarly, for diagnosing bacterial pathogens, combined nucleic acid tests for respiratory pathogens were employed to analyze the distribution of different bacteria and isolate them for identification. This approach enabled the concurrent detection of clinically common lower respiratory tract bacterial pathogens, namely methicillin-resistant *Staphylococcus aureus* (MRSA), *Mycobacterium tuberculosis*, *Pseudomonas maltophilia*, *Escherichia coli*, *Haemophilus influenzae*, *Klebsiella pneumoniae*, *Staphylococcus*, *Pseudomonas aeruginosa*, and *Acinetobacter baumannii*.

### **Schema design**

The schema employed in this study encompassed a series of modules that replicated the sequential diagnostic process undertaken by clinicians in real-world clinical settings. This schema was architected to extract relevant information from the symptoms, CT scans, and laboratory assay results to aid in diagnosing patients. The overall goal was to maximize data interoperability across diverse medical facilities for future research purposes. The diagnostic process began with the admission of a patient, whereupon the clinician initially assessed the patient's basic condition and laboratory examination results (subset 1). Based on this information, the clinicians determined whether the patient had an infectious disease. If the answer was affirmative, indicating the presence

of an infectious disease, the diagnostic process proceeded further. In the next step, the clinicians focused on determining the specific categorical infection type for the patient and prescribing the appropriate antibiotic treatment (subset 2). Subsequently, if the patient was diagnosed with viral or bacterial pneumonia, the schema applied additional modules to identify more refined subtypes of infections (subset 3 and subset 4). This step enabled a more granular classification of the pneumonia subtype, which could guide treatment decisions and further inform the clinical management of the patient. Moreover, for patients confirmed to be infected, the schema incorporated a prospective prediction module to estimate the likelihood of progression into severe pneumonia (subset 5). This predictive analysis would serve as a valuable tool for assessing the potential severity of the infections, enabling proactive intervention strategies to prevent or manage the development of severe illness.

### **Diagnosis system and network architectures**

The deep-learning model employed for subtyping of infectious diseases was based on the Swin-Transformer architecture.<sup>77</sup> The model structure comprised multiple components, including a token embedding layer and four stage blocks. Each stage block was interfaced to a convolutional layer that performed subsampling of the feature maps. This design followed a similar pattern to a typical ResNet-50 architecture. The model harnessed a token-embedding layer to represent the input data in a suitable format for deep learning computations.<sup>78</sup> The token embeddings captured the essential information from the input, serving as the input for subsequent stages of the model. To enhance the model's performance further, convolutional layers were strategically situated subsequent to each stage block. These convolutional layers undertook subsampling of the feature maps, thereby reducing their spatial dimensions while increasing the number of feature channels. This down-sampling process fortified the model's receptive scope and enhanced its ability to capture and characterize relevant features. The model architecture exhibited a methodical escalation in the number of dimensions after each down-sampling operation. This increase in dimensions contributed to the expansion of expressive capacity of the model and allowed for better feature representation and discrimination.

Next, the pre-processed normalized 3D volume ( $64 \times 256 \times 256$ ) was input into the convolutional token embedding (CTE) module. To optimize computational efficiency, a  $2 \times 7 \times 7$  convolution kernel with a stride of four was opted. This convolution operation directly embedded the input volume, thereby alleviating the computational burden while preserving the essential information within the data. Within each stage block, two stacked pre-normalization were incorporated to enhance the learning

capability of the model. The first pre-normalization consisted of LayerNorm and Cross-shaped window self-attention operations, along with a shortcut connection. The second pre-normalization step comprised LayerNorm and a multi-layer perceptron (MLP). Compared with the traditional Swin-Transformer architecture, the cross-shaped window blocks utilized in the model were designed to be computationally efficient (Table S6). By incorporating these pre-normalization layers and carefully managing the connections between them, a model that required fewer computations was achieved while maintaining strong representation and learning capabilities.

The diagnostic results derived from the CT scans, along with the corresponding multimodal input data, were fed into the subtype diagnosis multilabel classification module to obtain predictions for a spectrum of pneumonia subtypes, including bacterial pneumonia (BP), fungal pneumonia (FP), viral pneumonia (VP), and PTB. To effectively capture discriminative features from both the image data and text data, the cross-attention mechanism was employed. This attention mechanism conferred the model to selectively concentrate on the relevant regions and textual information contributing to the subtype diagnosis. By attending to specific regions of the radiologic volume and relevant textual features, the model could learn the distinctive patterns and characteristics associated with different pneumonia subtypes.

### **NLP model development**

Then a free-text information extraction model was developed to extract and reformat the chief complaint and history of present illness features from unstructured text data. This model employed NLP techniques (such as BERT) to analyze and extract relevant information from the textual input.<sup>79,80</sup> BERT is trained on an expansive corpus of text data, enabling the generation of high-quality contextualized word embeddings. These embeddings were utilized for pre-processing and initial feature learning in this study. To manipulate the structured data, such as laboratory test results, a normalization technique was employed to generate vector representations for specific factors (such as CRP). This normalization process contributed to standardizing the data and rendering them suitable for analysis. Furthermore, to enhance the analysis, a multi-layer fusion module was introduced. This module facilitates the bidirectional feature embedding of structured laboratory features and unstructured medical record features. By leveraging this mechanism, the interdependencies and relationships between different data elements were captured. Additionally, a structured data extraction model was implemented, specifically designed for extracting features from laboratory examinations and basic demographic information. This model processed the structured data to extract and normalized meaningful features that were relevant to the diagnosis

and classification of pneumonia. The combination of these information extraction models was able to transform unstructured free-text data and structured laboratory data into more structured and usable formats.

Explicitly, the model accepted either the free-text input of the chief complaint and history of the present illness or the structured-text input of laboratory data. It processed these inputs and generated multiple discrete vector features as outputs. Patient records could vary significantly in terms of length and the density of data points. To ensure consistent and efficient processing, the data was vectorized into a structured format with multiple lines. Each line had a specified length of 200, which allowed for better data organization and handling. This vectorization approach was able to handle variable-length input data in a consistent manner, ensuring compatibility and ease of processing. The NLP model, with its vectorization scheme, affords the efficient extraction of features from the chief complaint, history of the present illness, and laboratory data, delivering valuable and fixed-length inputs for downstream tasks in pulmonary infections diagnosis and classification.

### **Multimodal data fusion**

To enhance diagnostic accuracy and robustness, multimodal data fusion techniques have been utilized to combine multiple modalities, such as CT scans, chief complaints, and laboratory testing, to enhance diagnostic accuracy and robustness. In the infection diagnosis pipeline, different approaches were adopted based on the fusion level. These approaches encompassed early fusion, in which the raw modalities were combined before feature extraction; intermediate fusion, where the features from each modality were concatenated before classification; and late fusion, where the classification results from each modality were combined (Figure S4). To integrate the two modalities, an attention-based structure known as cross attention was also employed. This approach facilitated the efficacious capitalization of the complementary information in multimodal data, culminating in efficiency and reduced computational complexity. However, although the aforementioned self-attention module effectively captured intramodality relationships, it did not explore the inter-modality relationships, such as the relationship between image regions and sentence words. Therefore, the Cross-Attention Module was utilized in this study, which modeled both the inter-modality and intra-modality relationships within a harmonized framework.<sup>81</sup>

### **Network training strategy**

During the training process, the parameters of the Transformer model underwent initial pre-training using the unsupervised learning of visual features. This pre-training phase

involved contrasting cluster assignments, allowing the model to forge meaningful representations from the input data without explicit labels or annotations. The goal was to capture rich visual features that could be leveraged in ensuing supervised tasks. To train and test this model, the PyTorch deep-learning framework was run on a system equipped with 8 NVIDIA TITAN RTX GPUs. The AdamW optimizer was employed to train the model, incorporating a weight decay of 0.0001, to train the model. The learning rate was initialized to 0.001, which was then decayed by a factor of 10 after the 35th, 40th, and 50th epochs to fine-tune the training process. All the models were trained for 60 epochs. Constrained by GPU memory limits, the batch sizes for optimal performance were adjusted. Specifically, the batch size of each GPU was set to 16. These batch-size configurations allowed for efficient processing and training of the model while maximizing the utilization of available computational resources.

For the models based on subset 1 and subset 2, patient cases were randomly divided into two sets: a training set comprising 80% of the cases and a test set comprising the remaining 20%. These sets were utilized to train the models and evaluate their performance. Random splitting ensured the unbiased distribution of cases across the training and test sets. In the context of subset 3 and subset 4, where the focus was on less frequent diseases, additional measures were taken to account for the rarity of these conditions and to enhance the robustness of the AI system's identification capabilities. To achieve this, the representation of these rare diseases within the validation and testing sets were deliberately augmented. Particularly, in the testing subset, the rare diseases were represented 40%, exceeding their prevalence in the overall patient population. This strategy was devised to present a more challenging evaluation scenario and validate the ability of the model to accurately identify and classify these less frequent diseases. To broaden validation and generalize final results, a five-fold cross-validation approach was employed. The experiment was replicated five times for each disease model.

### **Comparison of AI and physicians**

Then we compared the performance of an AI framework with that of physicians in analyzing CT scans, chief complaints, and laboratory tests from electronic health records (EHR) to diagnose infections. The gold standard for diagnosis was established on sputum culture, polymerase chain reaction (PCR) or molecular testing results. To ensure a fair comparison, four practicing physicians were recruited to partake in the study. The physicians were categorized into two groups based on their level of clinical tenure: a junior group, consisting of physicians with less than 10 years of experience, and a senior group, consisting of physicians with over 10 years of experience. The

performances of the AI framework and the human physicians were evaluated using a weighted errors metric based on penalty scores. This evaluation metric was contrived to reflect the clinical performance of the AI system and physician expertise. During the testing phase, the AI framework and the physicians were furnished with the identical dataset, which comprised CT scans, corresponding chief complaints, and laboratory testing results from the electronic health records. The performance of each entity was assessed against the gold standard, evaluating their competence to gold standard accurately.

### **Prognosis analysis for integrating multimodal features**

To decipher the influence of each factor on severe pneumonia, a machine-learning approach was employed to extract quantized factors and non-quantized multimodal feature (M-score) from clinical texts, images. These features were subsequently used in a prognostic prediction model, employing the widely recognized gradient-boosting decision tree algorithm (GBDT) as the classifier<sup>82</sup>. To construct a comprehensive predictive score for the clinical outcome, the image features extracted by the AI system were combined with relevant clinical parameters, such as age, albumin levels, blood oxygen saturation, CRP, and other pertinent factors. This composite score was applied to predict the progression to critical illness, measured by the need for intensive care unit (ICU) transfer, mechanical ventilation, or death, and also considering the time elapsed since the initial hospital admission. Clinical and radiological features were selected predominantly based on their correlation with the severity status. The importance of these features was appraised by examining the magnitude of the log-rank test statistics using the Shapley Additive exPlanation (SHAP) method. This enabled physicians to visualize the impact of the relevant risk factors on the prognostic prediction of critical illnesses, providing valuable insights into the factors that influence disease progression. To ensure the robustness and reliability of the model, its performance was validated using a five-fold cross-validation approach, which allowed physicians to tune the optimal hyperparameters and assess the consistency and accuracy of the model across different data subsets.

The random survival forest method was suitable for integrating high-dimensional features. In this study, this method was employed to analyse the data and engender a multi-model score ranging from 0 to 1. This score epitomizes the average expected number of events across all the random survival forest model trees. By instituting a cut-off score of 0.5, patients were classified into two distinct groups: a high-risk group (with a score greater than 0.5) and a low-risk group (with a score less than 0.5). This stratification facilitated the differentiation of patients according to their predicted risks



of adverse outcomes. To delve deeper into stratified groups, the Kaplan-Meier estimator was utilized to calculate the survival times for high-risk and low-risk groups. Additionally, a log-rank test was conducted to evaluate the statistical significance of the differences observed between the two groups regarding survival outcomes.

### **Quantification and statistical analysis**

The MMI system was architected to perform multilabel classification and prognostic prediction tasks. To evaluate classification performance, the mean macro area under the receiver operating characteristic curve (AUC) was employed as a performance metric. Confidence intervals (CIs) were computed using a bootstrapping approach with nonparametric, unstratified resampling (1000 times) to estimate the uncertainty in the AUC estimates. Diagnostic performance of the system was quantified through the metrics of its sensitivity, specificity, and accuracy at the selected operating points. The operating point was selected to strike a balance between a low false negative diagnostic rate (sensitivity) and a low positive rate (1-specificity), with the thresholds adjusted accordingly. For statistical correlation significance, Pearson's and Spearman's correlation tests were used, supplemented by Holm-Bonferroni method for multiple comparisons. Normally distributed data were described using the mean and standard deviation (SD), while non-normally distributed data were described using the median and interquartile range (IQR). Categorical variables were presented as numbers and percentages. The deep learning models were trained, validated, and tested using PyTorch (v1.11.0), a renowned deep learning framework. For the data analysis, the scikit-learn library was utilized in Python. Graphs and visualizations were crafted using Python libraries (Matplotlib and Seaborn). Kaplan-Meier survival curves were generated to approximate the diagnosis time based on follow-up visits. The log-rank test compared the survival curves between the subgroups, allowing physicians to assess any significant differences in the time to diagnosis. The codes that support the findings of this study were available as follows: <https://github.com/chiehchiu/MMI>

## References

75. Zhang, S., Xu, J., Chen, Y.-C., et al. (2020). Revisiting 3D context modeling with supervised pre-training for universal lesion detection in CT slices. *Medical Image Computing and Computer Assisted Intervention (MICCAI)*.
76. Xiang, L., Ma, J., and Li, H. (2019). Invasiveness prediction of pulmonary adenocarcinomas using deep feature fusion networks. Preprint at arXiv. <https://doi.org/10.48550/arXiv.1909.09837>.
77. Zhang, S., Li, Z., Zhou, H.-Y., et al. (2023). Advancing 3D medical image analysis with variable dimension transform based supervised 3D pre-training. *Neurocomputing* **529**, 11-22. DOI: 10.1016/j.neucom.2023.01.012.
78. Wang, H., Li R., Jiang H., et al. (2023). LightToken: a task and model-agnostic lightweight token embedding framework for pre-trained language models. In *Proceedings of the 29th ACM SIGKDD Conference on Knowledge Discovery and Data Mining*, 2302-2313.
79. Liu, P., Yuan, W., Fu J., et al. (2023). Pre-train, prompt, and predict: a systematic survey of prompting methods in natural language processing. *ACM Computing Surveys* **55** (9), 1-35.
80. Thoppilan, R., Freitas, D., Hall, J., et al. (2022). Lamda: language models for dialog applications. Preprint at arXiv. <https://doi.org/10.48550/arXiv.2201.08239>
81. Ma, J., Li, X., Li, H., et al. (2021). Cross-view relation networks for mammogram mass detection. *International Conference on Pattern Recognition (ICPR)*.
82. Ke, G., Xu Z., Zhang J., et al. (2019). DeepGBM: a deep learning framework distilled by GBDT for online prediction tasks. In *Proceedings of the 25th ACM SIGKDD International Conference on Knowledge Discovery & Data Mining*, 384-394.
